# Supplementary material
Source: PubMed Central journal article supplement (PMC7642665)
Supplement: ajcr0010-3458-f10.pdf [file ajcr0010-3458-f10.pdf]

## Targeting AURKB for SKCM treatment

**Supplementary Table 1.** Candidate miRNAs targeting MTND4P12

| Pseudogene | miRNA            | mirAccession | Coefficient | P-value  |
|------------|------------------|--------------|-------------|----------|
| MTND4P12   | hsa-miR-766-5p   | MIMAT0022714 | 0.025       | 5.91E-01 |
| MTND4P12   | hsa-miR-1185-5p  | MIMAT0005798 | -0.006      | 9.07E-01 |
| MTND4P12   | hsa-miR-3679-5p  | MIMAT0018104 | 0.037       | 4.34E-01 |
| MTND4P12   | hsa-miR-6823-3p  | MIMAT0027547 | 0.036       | 4.44E-01 |
| MTND4P12   | hsa-miR-3605-5p  | MIMAT0017981 | 0.025       | 5.92E-01 |
| MTND4P12   | hsa-miR-580-3p   | MIMAT0003245 | 0.058       | 2.21E-01 |
| MTND4P12   | hsa-miR-574-5p   | MIMAT0004795 | -0.001      | 9.99E-01 |
| MTND4P12   | hsa-miR-6746-3p  | MIMAT0027393 | -0.017      | 7.18E-01 |
| MTND4P12   | hsa-miR-24-3p    | MIMAT0000080 | -0.013      | 7.86E-01 |
| MTND4P12   | hsa-miR-3174     | MIMAT0015051 | 0.075       | 1.13E-01 |
| MTND4P12   | hsa-miR-491-5p   | MIMAT0002807 | 0.037       | 4.29E-01 |
| MTND4P12   | hsa-miR-3163     | MIMAT0015037 | 0.016       | 7.38E-01 |
| MTND4P12   | hsa-miR-4458     | MIMAT0018980 | 0.041       | 3.86E-01 |
| MTND4P12   | hsa-let-7a-5p    | MIMAT0000062 | -0.021      | 6.61E-01 |
| MTND4P12   | hsa-let-7b-5p    | MIMAT0000063 | -0.028      | 5.58E-01 |
| MTND4P12   | hsa-let-7c-5p    | MIMAT0000064 | 0.015       | 7.55E-01 |
| MTND4P12   | hsa-let-7e-5p    | MIMAT0000066 | -0.097      | 3.92E-02 |
| MTND4P12   | hsa-let-7i-5p    | MIMAT0000415 | 0.068       | 1.48E-01 |
| MTND4P12   | hsa-miR-3184-5p  | MIMAT0015064 | 0.036       | 4.41E-01 |
| MTND4P12   | hsa-miR-196a-5p  | MIMAT0000226 | 0.045       | 3.38E-01 |
| MTND4P12   | hsa-miR-196b-5p  | MIMAT0001080 | 0.095       | 4.34E-02 |
| MTND4P12   | hsa-miR-4784     | MIMAT0019948 | 0.035       | 4.54E-01 |
| MTND4P12   | hsa-miR-3150b-3p | MIMAT0018194 | 0.117       | 1.31E-02 |
| MTND4P12   | hsa-miR-4525     | MIMAT0019064 | -0.067      | 1.58E-01 |
| MTND4P12   | hsa-miR-1193     | MIMAT0015049 | -0.114      | 1.59E-02 |
| MTND4P12   | hsa-miR-4677-3p  | MIMAT0019761 | 0.075       | 1.14E-01 |

## Targeting AURKB for SKCM treatment

**Supplementary Table 2.** Candidate mRNAs targeting hsa-let-7e-5p and hsa-miR-1193

| miRNA        | Target Gene | Experiments | Support Type          |
|--------------|-------------|-------------|-----------------------|
| hsa-miR-1193 | PVR         | PAR-CLIP    | Functional MTI (Weak) |
| hsa-miR-1193 | LRRC1       | PAR-CLIP    | Functional MTI (Weak) |
| hsa-miR-1193 | GAGE1       | PAR-CLIP    | Functional MTI (Weak) |
| hsa-miR-1193 | CAPZA1      | PAR-CLIP    | Functional MTI (Weak) |
| hsa-miR-1193 | TOMM20      | PAR-CLIP    | Functional MTI (Weak) |
| hsa-miR-1193 | AP3D1       | PAR-CLIP    | Functional MTI (Weak) |
| hsa-miR-1193 | POC1A       | PAR-CLIP    | Functional MTI (Weak) |
| hsa-miR-1193 | FSTL4       | PAR-CLIP    | Functional MTI (Weak) |
| hsa-miR-1193 | METTL1      | PAR-CLIP    | Functional MTI (Weak) |
| hsa-miR-1193 | EFNB1       | PAR-CLIP    | Functional MTI (Weak) |
| hsa-miR-1193 | XKR4        | PAR-CLIP    | Functional MTI (Weak) |
| hsa-miR-1193 | WASL        | PAR-CLIP    | Functional MTI (Weak) |
| hsa-miR-1193 | TWIST1      | PAR-CLIP    | Functional MTI (Weak) |
| hsa-miR-1193 | SOX4        | PAR-CLIP    | Functional MTI (Weak) |
| hsa-miR-1193 | PDPR        | PAR-CLIP    | Functional MTI (Weak) |
| hsa-miR-1193 | NRAS        | PAR-CLIP    | Functional MTI (Weak) |
| hsa-miR-1193 | KLHDC3      | PAR-CLIP    | Functional MTI (Weak) |
| hsa-miR-1193 | FAM217B     | PAR-CLIP    | Functional MTI (Weak) |
| hsa-miR-1193 | CCNF        | PAR-CLIP    | Functional MTI (Weak) |
| hsa-miR-1193 | CCND1       | PAR-CLIP    | Functional MTI (Weak) |
| hsa-miR-1193 | CALM3       | PAR-CLIP    | Functional MTI (Weak) |
| hsa-miR-1193 | BCL9L       | PAR-CLIP    | Functional MTI (Weak) |
| hsa-miR-1193 | AGO2        | PAR-CLIP    | Functional MTI (Weak) |
| hsa-miR-1193 | POGZ        | PAR-CLIP    | Functional MTI (Weak) |
| hsa-miR-1193 | H3F3A       | PAR-CLIP    | Functional MTI (Weak) |
| hsa-miR-1193 | RAB11FIP4   | PAR-CLIP    | Functional MTI (Weak) |
| hsa-miR-1193 | SYNPO2L     | PAR-CLIP    | Functional MTI (Weak) |
| hsa-miR-1193 | C11orf74    | PAR-CLIP    | Functional MTI (Weak) |
| hsa-miR-1193 | C6orf132    | PAR-CLIP    | Functional MTI (Weak) |
| hsa-miR-1193 | YARS        | PAR-CLIP    | Functional MTI (Weak) |
| hsa-miR-1193 | YOD1        | PAR-CLIP    | Functional MTI (Weak) |
| hsa-miR-1193 | ARGLU1      | PAR-CLIP    | Functional MTI (Weak) |
| hsa-miR-1193 | CDK2AP2     | PAR-CLIP    | Functional MTI (Weak) |
| hsa-miR-1193 | TBC1D4      | PAR-CLIP    | Functional MTI (Weak) |
| hsa-miR-1193 | ABI2        | PAR-CLIP    | Functional MTI (Weak) |

## Targeting AURKB for SKCM treatment

|              |           |           |                       |
|--------------|-----------|-----------|-----------------------|
| hsa-miR-1193 | SLC28A1   | PAR-CLIP  | Functional MTI (Weak) |
| hsa-miR-1193 | H3F3B     | PAR-CLIP  | Functional MTI (Weak) |
| hsa-miR-1193 | MEIS3P1   | PAR-CLIP  | Functional MTI (Weak) |
| hsa-miR-1193 | ASB16     | PAR-CLIP  | Functional MTI (Weak) |
| hsa-miR-1193 | CHD4      | PAR-CLIP  | Functional MTI (Weak) |
| hsa-miR-1193 | CRY2      | PAR-CLIP  | Functional MTI (Weak) |
| hsa-miR-1193 | DIRAS1    | PAR-CLIP  | Functional MTI (Weak) |
| hsa-miR-1193 | MYH9      | PAR-CLIP  | Functional MTI (Weak) |
| hsa-miR-1193 | PTMA      | PAR-CLIP  | Functional MTI (Weak) |
| hsa-miR-1193 | SERPINH1  | PAR-CLIP  | Functional MTI (Weak) |
| hsa-miR-1193 | SUSD1     | PAR-CLIP  | Functional MTI (Weak) |
| hsa-miR-1193 | WDTC1     | PAR-CLIP  | Functional MTI (Weak) |
| hsa-miR-1193 | WNT8B     | PAR-CLIP  | Functional MTI (Weak) |
| hsa-miR-1193 | CHD9      | HITS-CLIP | Functional MTI (Weak) |
| hsa-miR-1193 | CALU      | HITS-CLIP | Functional MTI (Weak) |
| hsa-miR-1193 | CCDC85C   | HITS-CLIP | Functional MTI (Weak) |
| hsa-miR-1193 | PLEKHA2   | HITS-CLIP | Functional MTI (Weak) |
| hsa-miR-1193 | COL22A1   | HITS-CLIP | Functional MTI (Weak) |
| hsa-miR-1193 | ICA1L     | HITS-CLIP | Functional MTI (Weak) |
| hsa-miR-1193 | SEC14L4   | HITS-CLIP | Functional MTI (Weak) |
| hsa-miR-1193 | CCDC69    | HITS-CLIP | Functional MTI (Weak) |
| hsa-miR-1193 | WDR92     | HITS-CLIP | Functional MTI (Weak) |
| hsa-miR-1193 | MSRB3     | HITS-CLIP | Functional MTI (Weak) |
| hsa-miR-1193 | HM13      | HITS-CLIP | Functional MTI (Weak) |
| hsa-miR-1193 | BLOC1S6   | HITS-CLIP | Functional MTI (Weak) |
| hsa-miR-1193 | SH3D19    | HITS-CLIP | Functional MTI (Weak) |
| hsa-miR-1193 | RALGPS2   | HITS-CLIP | Functional MTI (Weak) |
| hsa-miR-1193 | KIF1C     | HITS-CLIP | Functional MTI (Weak) |
| hsa-miR-1193 | MTRNR2L5  | HITS-CLIP | Functional MTI (Weak) |
| hsa-miR-1193 | C20orf144 | HITS-CLIP | Functional MTI (Weak) |
| hsa-miR-1193 | SLC35F6   | HITS-CLIP | Functional MTI (Weak) |
| hsa-miR-1193 | KIR3DX1   | HITS-CLIP | Functional MTI (Weak) |
| hsa-miR-1193 | ABHD15    | HITS-CLIP | Functional MTI (Weak) |
| hsa-miR-1193 | C9orf3    | HITS-CLIP | Functional MTI (Weak) |
| hsa-miR-1193 | GINM1     | HITS-CLIP | Functional MTI (Weak) |
| hsa-miR-1193 | SLC35F5   | HITS-CLIP | Functional MTI (Weak) |
| hsa-miR-1193 | IRGQ      | HITS-CLIP | Functional MTI (Weak) |
| hsa-miR-1193 | HFE       | HITS-CLIP | Functional MTI (Weak) |

## Targeting AURKB for SKCM treatment

|               |           |                       |                       |
|---------------|-----------|-----------------------|-----------------------|
| hsa-miR-1193  | ZNF786    | HITS-CLIP             | Functional MTI (Weak) |
| hsa-miR-1193  | UBN2      | HITS-CLIP             | Functional MTI (Weak) |
| hsa-miR-1193  | XIAP      | HITS-CLIP             | Functional MTI (Weak) |
| hsa-miR-1193  | PPP1R3B   | HITS-CLIP             | Functional MTI (Weak) |
| hsa-miR-1193  | HRH4      | HITS-CLIP             | Functional MTI (Weak) |
| hsa-miR-1193  | LRRD1     | HITS-CLIP             | Functional MTI (Weak) |
| hsa-miR-1193  | ISG20L2   | HITS-CLIP             | Functional MTI (Weak) |
| hsa-miR-1193  | TIMM29    | HITS-CLIP             | Functional MTI (Weak) |
| hsa-miR-1193  | MRPL10    | HITS-CLIP             | Functional MTI (Weak) |
| hsa-miR-1193  | KDELRL1   | HITS-CLIP             | Functional MTI (Weak) |
| hsa-miR-1193  | ZSCAN2    | HITS-CLIP             | Functional MTI (Weak) |
| hsa-miR-1193  | F2R       | HITS-CLIP             | Functional MTI (Weak) |
| hsa-miR-1193  | SMG1      | HITS-CLIP             | Functional MTI (Weak) |
| hsa-miR-1193  | QRFPR     | HITS-CLIP             | Functional MTI (Weak) |
| hsa-miR-1193  | PSMB2     | HITS-CLIP             | Functional MTI (Weak) |
| hsa-miR-1193  | ZNF669    | HITS-CLIP             | Functional MTI (Weak) |
| hsa-miR-1193  | SYNDIG1L  | HITS-CLIP             | Functional MTI (Weak) |
| hsa-miR-1193  | KIAA1586  | HITS-CLIP             | Functional MTI (Weak) |
| hsa-miR-1193  | ATG2A     | HITS-CLIP             | Functional MTI (Weak) |
| hsa-miR-1193  | FXN       | HITS-CLIP             | Functional MTI (Weak) |
| hsa-miR-1193  | MAP2      | HITS-CLIP             | Functional MTI (Weak) |
| hsa-miR-1193  | NLRP11    | HITS-CLIP             | Functional MTI (Weak) |
| hsa-miR-1193  | ZC2HC1C   | HITS-CLIP             | Functional MTI (Weak) |
| hsa-miR-1193  | ABCF1     | HITS-CLIP             | Functional MTI (Weak) |
| hsa-miR-1193  | BORCS7    | HITS-CLIP             | Functional MTI (Weak) |
| hsa-let-7e-5p | MYC       | TRAP                  | Functional MTI (Weak) |
| hsa-let-7e-5p | MYCN      | Reporter assay        | Functional MTI        |
| hsa-let-7e-5p | EZH2      | qRT-PCR//Western blot | Functional MTI        |
| hsa-let-7e-5p | TNFRSF10B | qRT-PCR//Western blot | Functional MTI        |
| hsa-let-7e-5p | POTEG     | PAR-CLIP              | Functional MTI (Weak) |
| hsa-let-7e-5p | RDX       | PAR-CLIP              | Functional MTI (Weak) |
| hsa-let-7e-5p | IGF2BP3   | PAR-CLIP              | Functional MTI (Weak) |
| hsa-let-7e-5p | NUP155    | PAR-CLIP              | Functional MTI (Weak) |
| hsa-let-7e-5p | PDP2      | PAR-CLIP              | Functional MTI (Weak) |
| hsa-let-7e-5p | CBX5      | PAR-CLIP              | Functional MTI (Weak) |
| hsa-let-7e-5p | PMPCA     | PAR-CLIP              | Functional MTI (Weak) |
| hsa-let-7e-5p | ADIPOR2   | PAR-CLIP              | Functional MTI (Weak) |
| hsa-let-7e-5p | ESPL1     | PAR-CLIP              | Functional MTI (Weak) |

## Targeting AURKB for SKCM treatment

|               |          |          |                       |
|---------------|----------|----------|-----------------------|
| hsa-let-7e-5p | TMTC3    | PAR-CLIP | Functional MTI (Weak) |
| hsa-let-7e-5p | TXLNA    | PAR-CLIP | Functional MTI (Weak) |
| hsa-let-7e-5p | NHLRC3   | PAR-CLIP | Functional MTI (Weak) |
| hsa-let-7e-5p | FNDC3A   | PAR-CLIP | Functional MTI (Weak) |
| hsa-let-7e-5p | ARID3B   | PAR-CLIP | Functional MTI (Weak) |
| hsa-let-7e-5p | SMCR8    | PAR-CLIP | Functional MTI (Weak) |
| hsa-let-7e-5p | IGF2BP1  | PAR-CLIP | Functional MTI (Weak) |
| hsa-let-7e-5p | ONECUT2  | PAR-CLIP | Functional MTI (Weak) |
| hsa-let-7e-5p | ZCCHC3   | PAR-CLIP | Functional MTI (Weak) |
| hsa-let-7e-5p | BACH1    | PAR-CLIP | Functional MTI (Weak) |
| hsa-let-7e-5p | PCGF3    | PAR-CLIP | Functional MTI (Weak) |
| hsa-let-7e-5p | SMARCAD1 | PAR-CLIP | Functional MTI (Weak) |
| hsa-let-7e-5p | GRPEL2   | PAR-CLIP | Functional MTI (Weak) |
| hsa-let-7e-5p | ABT1     | PAR-CLIP | Functional MTI (Weak) |
| hsa-let-7e-5p | MDM4     | PAR-CLIP | Functional MTI (Weak) |
| hsa-let-7e-5p | STK4     | PAR-CLIP | Functional MTI (Weak) |
| hsa-let-7e-5p | PDE12    | PAR-CLIP | Functional MTI (Weak) |
| hsa-let-7e-5p | TNFSF9   | PAR-CLIP | Functional MTI (Weak) |
| hsa-let-7e-5p | NCOA3    | PAR-CLIP | Functional MTI (Weak) |
| hsa-let-7e-5p | SUOX     | PAR-CLIP | Functional MTI (Weak) |
| hsa-let-7e-5p | NAA30    | PAR-CLIP | Functional MTI (Weak) |
| hsa-let-7e-5p | MAPK6    | PAR-CLIP | Functional MTI (Weak) |
| hsa-let-7e-5p | C5orf51  | PAR-CLIP | Functional MTI (Weak) |
| hsa-let-7e-5p | CDKN1A   | PAR-CLIP | Functional MTI (Weak) |
| hsa-let-7e-5p | UBXN2B   | PAR-CLIP | Functional MTI (Weak) |
| hsa-let-7e-5p | TRIM71   | PAR-CLIP | Functional MTI (Weak) |
| hsa-let-7e-5p | EDN1     | PAR-CLIP | Functional MTI (Weak) |
| hsa-let-7e-5p | SALL3    | PAR-CLIP | Functional MTI (Weak) |
| hsa-let-7e-5p | CDV3     | PAR-CLIP | Functional MTI (Weak) |
| hsa-let-7e-5p | PGRMC1   | PAR-CLIP | Functional MTI (Weak) |
| hsa-let-7e-5p | TXLNG    | PAR-CLIP | Functional MTI (Weak) |
| hsa-let-7e-5p | CLDN12   | PAR-CLIP | Functional MTI (Weak) |
| hsa-let-7e-5p | C11orf57 | PAR-CLIP | Functional MTI (Weak) |
| hsa-let-7e-5p | PEX11B   | PAR-CLIP | Functional MTI (Weak) |
| hsa-let-7e-5p | C1orf21  | PAR-CLIP | Functional MTI (Weak) |
| hsa-let-7e-5p | ZNF264   | PAR-CLIP | Functional MTI (Weak) |
| hsa-let-7e-5p | RRM2     | PAR-CLIP | Functional MTI (Weak) |
| hsa-let-7e-5p | SLC20A1  | PAR-CLIP | Functional MTI (Weak) |

## Targeting AURKB for SKCM treatment

|               |           |          |                       |
|---------------|-----------|----------|-----------------------|
| hsa-let-7e-5p | BZW1      | PAR-CLIP | Functional MTI (Weak) |
| hsa-let-7e-5p | KREMEN1   | PAR-CLIP | Functional MTI (Weak) |
| hsa-let-7e-5p | MXD1      | PAR-CLIP | Functional MTI (Weak) |
| hsa-let-7e-5p | NAT8L     | PAR-CLIP | Functional MTI (Weak) |
| hsa-let-7e-5p | PPP2R2A   | PAR-CLIP | Functional MTI (Weak) |
| hsa-let-7e-5p | ACER2     | PAR-CLIP | Functional MTI (Weak) |
| hsa-let-7e-5p | ATP6V1F   | PAR-CLIP | Functional MTI (Weak) |
| hsa-let-7e-5p | NDUFA4P1  | PAR-CLIP | Functional MTI (Weak) |
| hsa-let-7e-5p | ATP6V1G1  | PAR-CLIP | Functional MTI (Weak) |
| hsa-let-7e-5p | KIF27     | PAR-CLIP | Functional MTI (Weak) |
| hsa-let-7e-5p | ANKRD46   | PAR-CLIP | Functional MTI (Weak) |
| hsa-let-7e-5p | FMNL3     | PAR-CLIP | Functional MTI (Weak) |
| hsa-let-7e-5p | C19orf53  | PAR-CLIP | Functional MTI (Weak) |
| hsa-let-7e-5p | C1RL      | PAR-CLIP | Functional MTI (Weak) |
| hsa-let-7e-5p | NUCB2     | PAR-CLIP | Functional MTI (Weak) |
| hsa-let-7e-5p | QDPR      | PAR-CLIP | Functional MTI (Weak) |
| hsa-let-7e-5p | DISC1     | PAR-CLIP | Functional MTI (Weak) |
| hsa-let-7e-5p | HIST1H2BK | PAR-CLIP | Functional MTI (Weak) |
| hsa-let-7e-5p | RABL2A    | PAR-CLIP | Functional MTI (Weak) |
| hsa-let-7e-5p | ACOT9     | PAR-CLIP | Functional MTI (Weak) |
| hsa-let-7e-5p | GLO1      | PAR-CLIP | Functional MTI (Weak) |
| hsa-let-7e-5p | RABL2B    | PAR-CLIP | Functional MTI (Weak) |
| hsa-let-7e-5p | ZNF587    | PAR-CLIP | Functional MTI (Weak) |
| hsa-let-7e-5p | THEM6     | PAR-CLIP | Functional MTI (Weak) |
| hsa-let-7e-5p | MRPL12    | PAR-CLIP | Functional MTI (Weak) |
| hsa-let-7e-5p | FUT10     | PAR-CLIP | Functional MTI (Weak) |
| hsa-let-7e-5p | RRM1      | PAR-CLIP | Functional MTI (Weak) |
| hsa-let-7e-5p | NOM1      | PAR-CLIP | Functional MTI (Weak) |
| hsa-let-7e-5p | NOA1      | PAR-CLIP | Functional MTI (Weak) |
| hsa-let-7e-5p | OPA3      | PAR-CLIP | Functional MTI (Weak) |
| hsa-let-7e-5p | COL8A1    | PAR-CLIP | Functional MTI (Weak) |
| hsa-let-7e-5p | YAE1D1    | PAR-CLIP | Functional MTI (Weak) |
| hsa-let-7e-5p | ZNF8      | PAR-CLIP | Functional MTI (Weak) |
| hsa-let-7e-5p | ZC3HAV1L  | PAR-CLIP | Functional MTI (Weak) |
| hsa-let-7e-5p | YWHAZ     | PAR-CLIP | Functional MTI (Weak) |
| hsa-let-7e-5p | VCL       | PAR-CLIP | Functional MTI (Weak) |
| hsa-let-7e-5p | TSC22D2   | PAR-CLIP | Functional MTI (Weak) |
| hsa-let-7e-5p | SYNJ2BP   | PAR-CLIP | Functional MTI (Weak) |

## Targeting AURKB for SKCM treatment

|               |          |          |                       |
|---------------|----------|----------|-----------------------|
| hsa-let-7e-5p | RNF144B  | PAR-CLIP | Functional MTI (Weak) |
| hsa-let-7e-5p | RAB40C   | PAR-CLIP | Functional MTI (Weak) |
| hsa-let-7e-5p | PPP1R15B | PAR-CLIP | Functional MTI (Weak) |
| hsa-let-7e-5p | POLR2D   | PAR-CLIP | Functional MTI (Weak) |
| hsa-let-7e-5p | PLXND1   | PAR-CLIP | Functional MTI (Weak) |
| hsa-let-7e-5p | PGM2L1   | PAR-CLIP | Functional MTI (Weak) |
| hsa-let-7e-5p | NR6A1    | PAR-CLIP | Functional MTI (Weak) |
| hsa-let-7e-5p | NAA20    | PAR-CLIP | Functional MTI (Weak) |
| hsa-let-7e-5p | MTUS1    | PAR-CLIP | Functional MTI (Weak) |
| hsa-let-7e-5p | MLLT10   | PAR-CLIP | Functional MTI (Weak) |
| hsa-let-7e-5p | MIEF1    | PAR-CLIP | Functional MTI (Weak) |
| hsa-let-7e-5p | MAP2K7   | PAR-CLIP | Functional MTI (Weak) |
| hsa-let-7e-5p | LYN      | PAR-CLIP | Functional MTI (Weak) |
| hsa-let-7e-5p | LRRC20   | PAR-CLIP | Functional MTI (Weak) |
| hsa-let-7e-5p | KLHDC8B  | PAR-CLIP | Functional MTI (Weak) |
| hsa-let-7e-5p | KIAA0930 | PAR-CLIP | Functional MTI (Weak) |
| hsa-let-7e-5p | KCTD21   | PAR-CLIP | Functional MTI (Weak) |
| hsa-let-7e-5p | IFNLR1   | PAR-CLIP | Functional MTI (Weak) |
| hsa-let-7e-5p | ICOSLG   | PAR-CLIP | Functional MTI (Weak) |
| hsa-let-7e-5p | FAM83G   | PAR-CLIP | Functional MTI (Weak) |
| hsa-let-7e-5p | EIF4G2   | PAR-CLIP | Functional MTI (Weak) |
| hsa-let-7e-5p | EFHD2    | PAR-CLIP | Functional MTI (Weak) |
| hsa-let-7e-5p | ATXN7L3B | PAR-CLIP | Functional MTI (Weak) |
| hsa-let-7e-5p | ATXN7L3  | PAR-CLIP | Functional MTI (Weak) |
| hsa-let-7e-5p | ATG9A    | PAR-CLIP | Functional MTI (Weak) |
| hsa-let-7e-5p | ATG12    | PAR-CLIP | Functional MTI (Weak) |
| hsa-let-7e-5p | AREL1    | PAR-CLIP | Functional MTI (Weak) |
| hsa-let-7e-5p | AP1S1    | PAR-CLIP | Functional MTI (Weak) |
| hsa-let-7e-5p | AHR      | PAR-CLIP | Functional MTI (Weak) |
| hsa-let-7e-5p | AHCYL2   | PAR-CLIP | Functional MTI (Weak) |
| hsa-let-7e-5p | PLAGL2   | PAR-CLIP | Functional MTI (Weak) |
| hsa-let-7e-5p | ZNF28    | PAR-CLIP | Functional MTI (Weak) |
| hsa-let-7e-5p | TUBB2A   | PAR-CLIP | Functional MTI (Weak) |
| hsa-let-7e-5p | ZBTB5    | PAR-CLIP | Functional MTI (Weak) |
| hsa-let-7e-5p | SOCS1    | PAR-CLIP | Functional MTI (Weak) |
| hsa-let-7e-5p | PMAIP1   | PAR-CLIP | Functional MTI (Weak) |
| hsa-let-7e-5p | LIMD2    | PAR-CLIP | Functional MTI (Weak) |
| hsa-let-7e-5p | FAM43A   | PAR-CLIP | Functional MTI (Weak) |

## Targeting AURKB for SKCM treatment

|               |           |          |                       |
|---------------|-----------|----------|-----------------------|
| hsa-let-7e-5p | CEP120    | PAR-CLIP | Functional MTI (Weak) |
| hsa-let-7e-5p | TBC1D19   | PAR-CLIP | Functional MTI (Weak) |
| hsa-let-7e-5p | SNX17     | PAR-CLIP | Functional MTI (Weak) |
| hsa-let-7e-5p | SLC12A7   | PAR-CLIP | Functional MTI (Weak) |
| hsa-let-7e-5p | PLEKH01   | PAR-CLIP | Functional MTI (Weak) |
| hsa-let-7e-5p | PLCG2     | PAR-CLIP | Functional MTI (Weak) |
| hsa-let-7e-5p | GGA3      | PAR-CLIP | Functional MTI (Weak) |
| hsa-let-7e-5p | SDR42E1   | PAR-CLIP | Functional MTI (Weak) |
| hsa-let-7e-5p | MFSD8     | PAR-CLIP | Functional MTI (Weak) |
| hsa-let-7e-5p | HIST1H2BD | PAR-CLIP | Functional MTI (Weak) |
| hsa-let-7e-5p | THBS1     | PAR-CLIP | Functional MTI (Weak) |
| hsa-let-7e-5p | STRN      | PAR-CLIP | Functional MTI (Weak) |
| hsa-let-7e-5p | SLC5A6    | PAR-CLIP | Functional MTI (Weak) |
| hsa-let-7e-5p | SLC10A7   | PAR-CLIP | Functional MTI (Weak) |
| hsa-let-7e-5p | SUMO1     | PAR-CLIP | Functional MTI (Weak) |
| hsa-let-7e-5p | SEMA4C    | PAR-CLIP | Functional MTI (Weak) |
| hsa-let-7e-5p | RNFT1     | PAR-CLIP | Functional MTI (Weak) |
| hsa-let-7e-5p | RNF44     | PAR-CLIP | Functional MTI (Weak) |
| hsa-let-7e-5p | RBFOX2    | PAR-CLIP | Functional MTI (Weak) |
| hsa-let-7e-5p | NSD1      | PAR-CLIP | Functional MTI (Weak) |
| hsa-let-7e-5p | MBD2      | PAR-CLIP | Functional MTI (Weak) |
| hsa-let-7e-5p | KPNA5     | PAR-CLIP | Functional MTI (Weak) |
| hsa-let-7e-5p | KMT2D     | PAR-CLIP | Functional MTI (Weak) |
| hsa-let-7e-5p | CEP135    | PAR-CLIP | Functional MTI (Weak) |
| hsa-let-7e-5p | CELF1     | PAR-CLIP | Functional MTI (Weak) |
| hsa-let-7e-5p | C12orf4   | PAR-CLIP | Functional MTI (Weak) |
| hsa-let-7e-5p | ZNF644    | PAR-CLIP | Functional MTI (Weak) |
| hsa-let-7e-5p | IGDCC4    | PAR-CLIP | Functional MTI (Weak) |
| hsa-let-7e-5p | COIL      | PAR-CLIP | Functional MTI (Weak) |
| hsa-let-7e-5p | DIABLO    | PAR-CLIP | Functional MTI (Weak) |
| hsa-let-7e-5p | AK4       | PAR-CLIP | Functional MTI (Weak) |
| hsa-let-7e-5p | ZNF566    | PAR-CLIP | Functional MTI (Weak) |
| hsa-let-7e-5p | CD59      | PAR-CLIP | Functional MTI (Weak) |
| hsa-let-7e-5p | TRMO      | PAR-CLIP | Functional MTI (Weak) |
| hsa-let-7e-5p | FZD9      | PAR-CLIP | Functional MTI (Weak) |
| hsa-let-7e-5p | FBXW2     | PAR-CLIP | Functional MTI (Weak) |
| hsa-let-7e-5p | DVL3      | PAR-CLIP | Functional MTI (Weak) |
| hsa-let-7e-5p | DNA2      | PAR-CLIP | Functional MTI (Weak) |



## Targeting AURKB for SKCM treatment

|               |          |          |                       |
|---------------|----------|----------|-----------------------|
| hsa-let-7e-5p | SOD2     | PAR-CLIP | Functional MTI (Weak) |
| hsa-let-7e-5p | RRAD     | PAR-CLIP | Functional MTI (Weak) |
| hsa-let-7e-5p | OPRL1    | PAR-CLIP | Functional MTI (Weak) |
| hsa-let-7e-5p | LEFTY1   | PAR-CLIP | Functional MTI (Weak) |
| hsa-let-7e-5p | RBM12B   | PAR-CLIP | Functional MTI (Weak) |
| hsa-let-7e-5p | SLC16A9  | PAR-CLIP | Functional MTI (Weak) |
| hsa-let-7e-5p | PM20D2   | PAR-CLIP | Functional MTI (Weak) |
| hsa-let-7e-5p | ZNF200   | PAR-CLIP | Functional MTI (Weak) |
| hsa-let-7e-5p | TGFBR3   | PAR-CLIP | Functional MTI (Weak) |
| hsa-let-7e-5p | MSI2     | PAR-CLIP | Functional MTI (Weak) |
| hsa-let-7e-5p | LRIG3    | PAR-CLIP | Functional MTI (Weak) |
| hsa-let-7e-5p | FBXL20   | PAR-CLIP | Functional MTI (Weak) |
| hsa-let-7e-5p | EPHA4    | PAR-CLIP | Functional MTI (Weak) |
| hsa-let-7e-5p | DUSP1    | PAR-CLIP | Functional MTI (Weak) |
| hsa-let-7e-5p | DNAL1    | PAR-CLIP | Functional MTI (Weak) |
| hsa-let-7e-5p | COLEC12  | PAR-CLIP | Functional MTI (Weak) |
| hsa-let-7e-5p | CCNT2    | PAR-CLIP | Functional MTI (Weak) |
| hsa-let-7e-5p | BEND4    | PAR-CLIP | Functional MTI (Weak) |
| hsa-let-7e-5p | KIAA0391 | PAR-CLIP | Functional MTI (Weak) |
| hsa-let-7e-5p | ECHDC1   | PAR-CLIP | Functional MTI (Weak) |
| hsa-let-7e-5p | ACTA1    | PAR-CLIP | Functional MTI (Weak) |
| hsa-let-7e-5p | AKAP8    | PAR-CLIP | Functional MTI (Weak) |
| hsa-let-7e-5p | RAD18    | PAR-CLIP | Functional MTI (Weak) |
| hsa-let-7e-5p | ZNF460   | PAR-CLIP | Functional MTI (Weak) |
| hsa-let-7e-5p | USP38    | PAR-CLIP | Functional MTI (Weak) |
| hsa-let-7e-5p | PLEKHA3  | PAR-CLIP | Functional MTI (Weak) |
| hsa-let-7e-5p | PDZD8    | PAR-CLIP | Functional MTI (Weak) |
| hsa-let-7e-5p | HAND1    | PAR-CLIP | Functional MTI (Weak) |
| hsa-let-7e-5p | FAM222B  | PAR-CLIP | Functional MTI (Weak) |
| hsa-let-7e-5p | C19orf47 | PAR-CLIP | Functional MTI (Weak) |
| hsa-let-7e-5p | ARIH1    | PAR-CLIP | Functional MTI (Weak) |
| hsa-let-7e-5p | PEG10    | PAR-CLIP | Functional MTI (Weak) |
| hsa-let-7e-5p | SURF4    | PAR-CLIP | Functional MTI (Weak) |
| hsa-let-7e-5p | PARP16   | PAR-CLIP | Functional MTI (Weak) |
| hsa-let-7e-5p | E2F6     | PAR-CLIP | Functional MTI (Weak) |
| hsa-let-7e-5p | ABHD17C  | PAR-CLIP | Functional MTI (Weak) |
| hsa-let-7e-5p | THYN1    | PAR-CLIP | Functional MTI (Weak) |
| hsa-let-7e-5p | TGOLN2   | PAR-CLIP | Functional MTI (Weak) |

## Targeting AURKB for SKCM treatment

|               |          |          |                       |
|---------------|----------|----------|-----------------------|
| hsa-let-7e-5p | ZBTB37   | PAR-CLIP | Functional MTI (Weak) |
| hsa-let-7e-5p | GOLGA4   | PAR-CLIP | Functional MTI (Weak) |
| hsa-let-7e-5p | FAM104A  | PAR-CLIP | Functional MTI (Weak) |
| hsa-let-7e-5p | ZFAND4   | PAR-CLIP | Functional MTI (Weak) |
| hsa-let-7e-5p | RAB19    | PAR-CLIP | Functional MTI (Weak) |
| hsa-let-7e-5p | ADH5     | PAR-CLIP | Functional MTI (Weak) |
| hsa-let-7e-5p | CASTOR2  | PAR-CLIP | Functional MTI (Weak) |
| hsa-let-7e-5p | CRX      | PAR-CLIP | Functional MTI (Weak) |
| hsa-let-7e-5p | CXCL8    | PAR-CLIP | Functional MTI (Weak) |
| hsa-let-7e-5p | DYRK3    | PAR-CLIP | Functional MTI (Weak) |
| hsa-let-7e-5p | ERO1A    | PAR-CLIP | Functional MTI (Weak) |
| hsa-let-7e-5p | FNDC9    | PAR-CLIP | Functional MTI (Weak) |
| hsa-let-7e-5p | GATM     | PAR-CLIP | Functional MTI (Weak) |
| hsa-let-7e-5p | GPAT4    | PAR-CLIP | Functional MTI (Weak) |
| hsa-let-7e-5p | KIAA1143 | PAR-CLIP | Functional MTI (Weak) |
| hsa-let-7e-5p | MARCKSL1 | PAR-CLIP | Functional MTI (Weak) |
| hsa-let-7e-5p | MARS2    | PAR-CLIP | Functional MTI (Weak) |
| hsa-let-7e-5p | MEF2D    | PAR-CLIP | Functional MTI (Weak) |
| hsa-let-7e-5p | MIDN     | PAR-CLIP | Functional MTI (Weak) |
| hsa-let-7e-5p | PBX2     | PAR-CLIP | Functional MTI (Weak) |
| hsa-let-7e-5p | PDLIM5   | PAR-CLIP | Functional MTI (Weak) |
| hsa-let-7e-5p | PLD3     | PAR-CLIP | Functional MTI (Weak) |
| hsa-let-7e-5p | POLL     | PAR-CLIP | Functional MTI (Weak) |
| hsa-let-7e-5p | POTEM    | PAR-CLIP | Functional MTI (Weak) |
| hsa-let-7e-5p | RHBDF2   | PAR-CLIP | Functional MTI (Weak) |
| hsa-let-7e-5p | SOCS7    | PAR-CLIP | Functional MTI (Weak) |
| hsa-let-7e-5p | SYT1     | PAR-CLIP | Functional MTI (Weak) |
| hsa-let-7e-5p | TIAF1    | PAR-CLIP | Functional MTI (Weak) |
| hsa-let-7e-5p | TOMM40L  | PAR-CLIP | Functional MTI (Weak) |
| hsa-let-7e-5p | TRAPPC10 | PAR-CLIP | Functional MTI (Weak) |
| hsa-let-7e-5p | TUBB4A   | PAR-CLIP | Functional MTI (Weak) |
| hsa-let-7e-5p | ZNF609   | PAR-CLIP | Functional MTI (Weak) |
| hsa-let-7e-5p | AQP6     | PAR-CLIP | Functional MTI (Weak) |
| hsa-let-7e-5p | IL6R     | PAR-CLIP | Functional MTI (Weak) |
| hsa-let-7e-5p | MAGEA12  | PAR-CLIP | Functional MTI (Weak) |
| hsa-let-7e-5p | MAGEA3   | PAR-CLIP | Functional MTI (Weak) |
| hsa-let-7e-5p | MAGEA6   | PAR-CLIP | Functional MTI (Weak) |
| hsa-let-7e-5p | PDGFB    | PAR-CLIP | Functional MTI (Weak) |

## Targeting AURKB for SKCM treatment

|               |              |           |                       |
|---------------|--------------|-----------|-----------------------|
| hsa-let-7e-5p | PRR5-ARHGAP8 | PAR-CLIP  | Functional MTI (Weak) |
| hsa-let-7e-5p | STX3         | PAR-CLIP  | Functional MTI (Weak) |
| hsa-let-7e-5p | TMED4        | PAR-CLIP  | Functional MTI (Weak) |
| hsa-let-7e-5p | USP47        | PAR-CLIP  | Functional MTI (Weak) |
| hsa-let-7e-5p | CDKAL1       | HITS-CLIP | Functional MTI (Weak) |
| hsa-let-7e-5p | HMGA1        | HITS-CLIP | Functional MTI (Weak) |
| hsa-let-7e-5p | CHTOP        | HITS-CLIP | Functional MTI (Weak) |
| hsa-let-7e-5p | ZNF774       | HITS-CLIP | Functional MTI (Weak) |
| hsa-let-7e-5p | RHD          | HITS-CLIP | Functional MTI (Weak) |
| hsa-let-7e-5p | FAM105A      | HITS-CLIP | Functional MTI (Weak) |
| hsa-let-7e-5p | SLC11A2      | HITS-CLIP | Functional MTI (Weak) |
| hsa-let-7e-5p | TMED5        | HITS-CLIP | Functional MTI (Weak) |
| hsa-let-7e-5p | HERPUD1      | HITS-CLIP | Functional MTI (Weak) |
| hsa-let-7e-5p | GABPB1       | HITS-CLIP | Functional MTI (Weak) |
| hsa-let-7e-5p | FIGN         | HITS-CLIP | Functional MTI (Weak) |
| hsa-let-7e-5p | C1orf210     | HITS-CLIP | Functional MTI (Weak) |
| hsa-let-7e-5p | IKZF3        | HITS-CLIP | Functional MTI (Weak) |
| hsa-let-7e-5p | ZBTB80S      | HITS-CLIP | Functional MTI (Weak) |
| hsa-let-7e-5p | ZNF611       | HITS-CLIP | Functional MTI (Weak) |
| hsa-let-7e-5p | MCF2L2       | HITS-CLIP | Functional MTI (Weak) |
| hsa-let-7e-5p | HASPIN       | HITS-CLIP | Functional MTI (Weak) |
| hsa-let-7e-5p | EMILIN2      | HITS-CLIP | Functional MTI (Weak) |
| hsa-let-7e-5p | RWDD1        | HITS-CLIP | Functional MTI (Weak) |
| hsa-let-7e-5p | FM04         | HITS-CLIP | Functional MTI (Weak) |
| hsa-let-7e-5p | ZNF556       | HITS-CLIP | Functional MTI (Weak) |
| hsa-let-7e-5p | PRIM2        | HITS-CLIP | Functional MTI (Weak) |
| hsa-let-7e-5p | ZNF584       | HITS-CLIP | Functional MTI (Weak) |
| hsa-let-7e-5p | ZNF578       | HITS-CLIP | Functional MTI (Weak) |
| hsa-let-7e-5p | ARL8B        | HITS-CLIP | Functional MTI (Weak) |
| hsa-let-7e-5p | INTS7        | HITS-CLIP | Functional MTI (Weak) |
| hsa-let-7e-5p | RFC2         | HITS-CLIP | Functional MTI (Weak) |
| hsa-let-7e-5p | BRI3BP       | HITS-CLIP | Functional MTI (Weak) |
| hsa-let-7e-5p | STAT2        | HITS-CLIP | Functional MTI (Weak) |
| hsa-let-7e-5p | ZNF738       | HITS-CLIP | Functional MTI (Weak) |
| hsa-let-7e-5p | DTX3L        | HITS-CLIP | Functional MTI (Weak) |
| hsa-let-7e-5p | EIF4A3       | HITS-CLIP | Functional MTI (Weak) |
| hsa-let-7e-5p | DNAH9        | HITS-CLIP | Functional MTI (Weak) |
| hsa-let-7e-5p | SLC19A3      | HITS-CLIP | Functional MTI (Weak) |

## Targeting AURKB for SKCM treatment

|               |           |           |                       |
|---------------|-----------|-----------|-----------------------|
| hsa-let-7e-5p | ITGA3     | HITS-CLIP | Functional MTI (Weak) |
| hsa-let-7e-5p | SLC38A7   | HITS-CLIP | Functional MTI (Weak) |
| hsa-let-7e-5p | SAR1A     | HITS-CLIP | Functional MTI (Weak) |
| hsa-let-7e-5p | PHACTR4   | HITS-CLIP | Functional MTI (Weak) |
| hsa-let-7e-5p | MTX3      | HITS-CLIP | Functional MTI (Weak) |
| hsa-let-7e-5p | CPA4      | HITS-CLIP | Functional MTI (Weak) |
| hsa-let-7e-5p | COX6B1    | HITS-CLIP | Functional MTI (Weak) |
| hsa-let-7e-5p | FPR1      | HITS-CLIP | Functional MTI (Weak) |
| hsa-let-7e-5p | ATXN2     | HITS-CLIP | Functional MTI (Weak) |
| hsa-let-7e-5p | ZNF799    | HITS-CLIP | Functional MTI (Weak) |
| hsa-let-7e-5p | DNAJC28   | HITS-CLIP | Functional MTI (Weak) |
| hsa-let-7e-5p | ZNF417    | HITS-CLIP | Functional MTI (Weak) |
| hsa-let-7e-5p | ZNF443    | HITS-CLIP | Functional MTI (Weak) |
| hsa-let-7e-5p | PRSS22    | HITS-CLIP | Functional MTI (Weak) |
| hsa-let-7e-5p | NHLRC2    | HITS-CLIP | Functional MTI (Weak) |
| hsa-let-7e-5p | KIAA1328  | HITS-CLIP | Functional MTI (Weak) |
| hsa-let-7e-5p | IPO9      | HITS-CLIP | Functional MTI (Weak) |
| hsa-let-7e-5p | EDEM3     | HITS-CLIP | Functional MTI (Weak) |
| hsa-let-7e-5p | CTPS1     | HITS-CLIP | Functional MTI (Weak) |
| hsa-let-7e-5p | AMD1      | HITS-CLIP | Functional MTI (Weak) |
| hsa-let-7e-5p | NAP1L1    | HITS-CLIP | Functional MTI (Weak) |
| hsa-let-7e-5p | PAFAH2    | HITS-CLIP | Functional MTI (Weak) |
| hsa-let-7e-5p | TBC1D31   | CLASH     | Functional MTI (Weak) |
| hsa-let-7e-5p | FAM219B   | CLASH     | Functional MTI (Weak) |
| hsa-let-7e-5p | C11orf91  | CLASH     | Functional MTI (Weak) |
| hsa-let-7e-5p | CENPP     | CLASH     | Functional MTI (Weak) |
| hsa-let-7e-5p | TMEM107   | CLASH     | Functional MTI (Weak) |
| hsa-let-7e-5p | SREBF1    | CLASH     | Functional MTI (Weak) |
| hsa-let-7e-5p | DAAM1     | CLASH     | Functional MTI (Weak) |
| hsa-let-7e-5p | DGCR8     | CLASH     | Functional MTI (Weak) |
| hsa-let-7e-5p | RAP1A     | CLASH     | Functional MTI (Weak) |
| hsa-let-7e-5p | RPA1      | CLASH     | Functional MTI (Weak) |
| hsa-let-7e-5p | SKIV2L    | CLASH     | Functional MTI (Weak) |
| hsa-let-7e-5p | RPS27     | CLASH     | Functional MTI (Weak) |
| hsa-let-7e-5p | ARNT2     | CLASH     | Functional MTI (Weak) |
| hsa-let-7e-5p | GPM6B     | CLASH     | Functional MTI (Weak) |
| hsa-let-7e-5p | TTLL12    | CLASH     | Functional MTI (Weak) |
| hsa-let-7e-5p | HIST2H2BF | CLASH     | Functional MTI (Weak) |

## Targeting AURKB for SKCM treatment

|               |          |       |                       |
|---------------|----------|-------|-----------------------|
| hsa-let-7e-5p | CELF2    | CLASH | Functional MTI (Weak) |
| hsa-let-7e-5p | VPS13D   | CLASH | Functional MTI (Weak) |
| hsa-let-7e-5p | RPL10    | CLASH | Functional MTI (Weak) |
| hsa-let-7e-5p | SPCS2    | CLASH | Functional MTI (Weak) |
| hsa-let-7e-5p | DCAF8    | CLASH | Functional MTI (Weak) |
| hsa-let-7e-5p | CTC1     | CLASH | Functional MTI (Weak) |
| hsa-let-7e-5p | NAA60    | CLASH | Functional MTI (Weak) |
| hsa-let-7e-5p | PHF3     | CLASH | Functional MTI (Weak) |
| hsa-let-7e-5p | TUBA1B   | CLASH | Functional MTI (Weak) |
| hsa-let-7e-5p | SHANK1   | CLASH | Functional MTI (Weak) |
| hsa-let-7e-5p | SKA2     | CLASH | Functional MTI (Weak) |
| hsa-let-7e-5p | SPTBN1   | CLASH | Functional MTI (Weak) |
| hsa-let-7e-5p | ND2      | CLASH | Functional MTI (Weak) |
| hsa-let-7e-5p | MED13L   | CLASH | Functional MTI (Weak) |
| hsa-let-7e-5p | RCOR3    | CLASH | Functional MTI (Weak) |
| hsa-let-7e-5p | MACF1    | CLASH | Functional MTI (Weak) |
| hsa-let-7e-5p | PCBP2    | CLASH | Functional MTI (Weak) |
| hsa-let-7e-5p | UBAP2L   | CLASH | Functional MTI (Weak) |
| hsa-let-7e-5p | CDCA3    | CLASH | Functional MTI (Weak) |
| hsa-let-7e-5p | CABLES1  | CLASH | Functional MTI (Weak) |
| hsa-let-7e-5p | BTRC     | CLASH | Functional MTI (Weak) |
| hsa-let-7e-5p | C12orf49 | CLASH | Functional MTI (Weak) |
| hsa-let-7e-5p | TIMP3    | CLASH | Functional MTI (Weak) |
| hsa-let-7e-5p | RCC1L    | CLASH | Functional MTI (Weak) |
| hsa-let-7e-5p | SLC2A11  | CLASH | Functional MTI (Weak) |
| hsa-let-7e-5p | NF1      | CLASH | Functional MTI (Weak) |
| hsa-let-7e-5p | LRRC8A   | CLASH | Functional MTI (Weak) |
| hsa-let-7e-5p | RUNX1T1  | CLASH | Functional MTI (Weak) |
| hsa-let-7e-5p | DTNB     | CLASH | Functional MTI (Weak) |
| hsa-let-7e-5p | SCMH1    | CLASH | Functional MTI (Weak) |
| hsa-let-7e-5p | YWHAG    | CLASH | Functional MTI (Weak) |
| hsa-let-7e-5p | RHBDD2   | CLASH | Functional MTI (Weak) |
| hsa-let-7e-5p | ND5      | CLASH | Functional MTI (Weak) |
| hsa-let-7e-5p | NDST1    | CLASH | Functional MTI (Weak) |
| hsa-let-7e-5p | EIF4A1   | CLASH | Functional MTI (Weak) |
| hsa-let-7e-5p | BAHCC1   | CLASH | Functional MTI (Weak) |
| hsa-let-7e-5p | CARM1    | CLASH | Functional MTI (Weak) |

## Targeting AURKB for SKCM treatment

|               |         |       |                       |
|---------------|---------|-------|-----------------------|
| hsa-let-7e-5p | DYRK2   | CLASH | Functional MTI (Weak) |
| hsa-let-7e-5p | ND3     | CLASH | Functional MTI (Weak) |
| hsa-let-7e-5p | PIGS    | CLASH | Functional MTI (Weak) |
| hsa-let-7e-5p | ALG13   | CLASH | Functional MTI (Weak) |
| hsa-let-7e-5p | RPN2    | CLASH | Functional MTI (Weak) |
| hsa-let-7e-5p | RPL12   | CLASH | Functional MTI (Weak) |
| hsa-let-7e-5p | NME4    | CLASH | Functional MTI (Weak) |
| hsa-let-7e-5p | IVD     | CLASH | Functional MTI (Weak) |
| hsa-let-7e-5p | JAZF1   | CLASH | Functional MTI (Weak) |
| hsa-let-7e-5p | ND4     | CLASH | Functional MTI (Weak) |
| hsa-let-7e-5p | VARS    | CLASH | Functional MTI (Weak) |
| hsa-let-7e-5p | RNF26   | CLASH | Functional MTI (Weak) |
| hsa-let-7e-5p | LHFPL2  | CLASH | Functional MTI (Weak) |
| hsa-let-7e-5p | ARCN1   | CLASH | Functional MTI (Weak) |
| hsa-let-7e-5p | COX1    | CLASH | Functional MTI (Weak) |
| hsa-let-7e-5p | SLC12A4 | CLASH | Functional MTI (Weak) |
| hsa-let-7e-5p | AEBP2   | CLASH | Functional MTI (Weak) |
| hsa-let-7e-5p | GATB    | CLASH | Functional MTI (Weak) |
| hsa-let-7e-5p | UROC1   | CLASH | Functional MTI (Weak) |
| hsa-let-7e-5p | BSDC1   | CLASH | Functional MTI (Weak) |
| hsa-let-7e-5p | PTK2    | CLASH | Functional MTI (Weak) |
| hsa-let-7e-5p | CDC5L   | CLASH | Functional MTI (Weak) |
| hsa-let-7e-5p | EN2     | CLASH | Functional MTI (Weak) |
| hsa-let-7e-5p | SSB     | CLASH | Functional MTI (Weak) |
| hsa-let-7e-5p | SLC03A1 | CLASH | Functional MTI (Weak) |
| hsa-let-7e-5p | RRAGC   | CLASH | Functional MTI (Weak) |
| hsa-let-7e-5p | ZNF236  | CLASH | Functional MTI (Weak) |
| hsa-let-7e-5p | SEMA4B  | CLASH | Functional MTI (Weak) |
| hsa-let-7e-5p | SERBP1  | CLASH | Functional MTI (Weak) |
| hsa-let-7e-5p | GTF2I   | CLASH | Functional MTI (Weak) |
| hsa-let-7e-5p | JMJD1C  | CLASH | Functional MTI (Weak) |
| hsa-let-7e-5p | OTUD5   | CLASH | Functional MTI (Weak) |
| hsa-let-7e-5p | NOLC1   | CLASH | Functional MTI (Weak) |
| hsa-let-7e-5p | PPIG    | CLASH | Functional MTI (Weak) |
| hsa-let-7e-5p | PSMD2   | CLASH | Functional MTI (Weak) |
| hsa-let-7e-5p | UGGT1   | CLASH | Functional MTI (Weak) |
| hsa-let-7e-5p | VAMP2   | CLASH | Functional MTI (Weak) |
| hsa-let-7e-5p | LSR     | CLASH | Functional MTI (Weak) |

## Targeting AURKB for SKCM treatment

|               |          |       |                       |
|---------------|----------|-------|-----------------------|
| hsa-let-7e-5p | KIAA0355 | CLASH | Functional MTI (Weak) |
| hsa-let-7e-5p | RPSA     | CLASH | Functional MTI (Weak) |
| hsa-let-7e-5p | DCAF6    | CLASH | Functional MTI (Weak) |
| hsa-let-7e-5p | UHRF1BP1 | CLASH | Functional MTI (Weak) |
| hsa-let-7e-5p | OTUB1    | CLASH | Functional MTI (Weak) |
| hsa-let-7e-5p | PIGP     | CLASH | Functional MTI (Weak) |
| hsa-let-7e-5p | LMLN     | CLASH | Functional MTI (Weak) |
| hsa-let-7e-5p | PPP2R1A  | CLASH | Functional MTI (Weak) |
| hsa-let-7e-5p | HIPK1    | CLASH | Functional MTI (Weak) |
| hsa-let-7e-5p | SERF2    | CLASH | Functional MTI (Weak) |
| hsa-let-7e-5p | RBM4     | CLASH | Functional MTI (Weak) |
| hsa-let-7e-5p | RBM14    | CLASH | Functional MTI (Weak) |
| hsa-let-7e-5p | HMGB1    | CLASH | Functional MTI (Weak) |
| hsa-let-7e-5p | GMPS     | CLASH | Functional MTI (Weak) |
| hsa-let-7e-5p | DIAPH1   | CLASH | Functional MTI (Weak) |
| hsa-let-7e-5p | STAM     | CLASH | Functional MTI (Weak) |
| hsa-let-7e-5p | YWHAQ    | CLASH | Functional MTI (Weak) |
| hsa-let-7e-5p | APPL1    | CLASH | Functional MTI (Weak) |
| hsa-let-7e-5p | MARCH5   | CLASH | Functional MTI (Weak) |
| hsa-let-7e-5p | SQLE     | CLASH | Functional MTI (Weak) |
| hsa-let-7e-5p | TIMM50   | CLASH | Functional MTI (Weak) |
| hsa-let-7e-5p | NDUFA3   | CLASH | Functional MTI (Weak) |
| hsa-let-7e-5p | NDUFS5   | CLASH | Functional MTI (Weak) |
| hsa-let-7e-5p | NRSN2    | CLASH | Functional MTI (Weak) |
| hsa-let-7e-5p | SALL1    | CLASH | Functional MTI (Weak) |
| hsa-let-7e-5p | COX3     | CLASH | Functional MTI (Weak) |
| hsa-let-7e-5p | RABL6    | CLASH | Functional MTI (Weak) |
| hsa-let-7e-5p | SUPT4H1  | CLASH | Functional MTI (Weak) |
| hsa-let-7e-5p | PACS2    | CLASH | Functional MTI (Weak) |
| hsa-let-7e-5p | MTMR14   | CLASH | Functional MTI (Weak) |
| hsa-let-7e-5p | LUZP1    | CLASH | Functional MTI (Weak) |
| hsa-let-7e-5p | PFAS     | CLASH | Functional MTI (Weak) |
| hsa-let-7e-5p | SUZ12    | CLASH | Functional MTI (Weak) |
| hsa-let-7e-5p | PAPD4    | CLASH | Functional MTI (Weak) |
| hsa-let-7e-5p | QSOX1    | CLASH | Functional MTI (Weak) |
| hsa-let-7e-5p | SPATA13  | CLASH | Functional MTI (Weak) |
| hsa-let-7e-5p | DHX57    | CLASH | Functional MTI (Weak) |
| hsa-let-7e-5p | KATNB1   | CLASH | Functional MTI (Weak) |

## Targeting AURKB for SKCM treatment

|               |          |       |                       |
|---------------|----------|-------|-----------------------|
| hsa-let-7e-5p | COL6A1   | CLASH | Functional MTI (Weak) |
| hsa-let-7e-5p | DHX15    | CLASH | Functional MTI (Weak) |
| hsa-let-7e-5p | MTCH2    | CLASH | Functional MTI (Weak) |
| hsa-let-7e-5p | KIAA0100 | CLASH | Functional MTI (Weak) |
| hsa-let-7e-5p | SUGP2    | CLASH | Functional MTI (Weak) |
| hsa-let-7e-5p | NCLN     | CLASH | Functional MTI (Weak) |
| hsa-let-7e-5p | ATXN2L   | CLASH | Functional MTI (Weak) |
| hsa-let-7e-5p | PES1     | CLASH | Functional MTI (Weak) |
| hsa-let-7e-5p | GNG5     | CLASH | Functional MTI (Weak) |
| hsa-let-7e-5p | ARHGAP19 | CLASH | Functional MTI (Weak) |
| hsa-let-7e-5p | MTFR1    | CLASH | Functional MTI (Weak) |
| hsa-let-7e-5p | IRS2     | CLASH | Functional MTI (Weak) |
| hsa-let-7e-5p | IRS4     | CLASH | Functional MTI (Weak) |
| hsa-let-7e-5p | PPP1R10  | CLASH | Functional MTI (Weak) |
| hsa-let-7e-5p | ZNF284   | CLASH | Functional MTI (Weak) |
| hsa-let-7e-5p | YWHAE    | CLASH | Functional MTI (Weak) |
| hsa-let-7e-5p | SCD      | CLASH | Functional MTI (Weak) |
| hsa-let-7e-5p | FDPS     | CLASH | Functional MTI (Weak) |
| hsa-let-7e-5p | KRBOX4   | CLASH | Functional MTI (Weak) |
| hsa-let-7e-5p | BRI3     | CLASH | Functional MTI (Weak) |
| hsa-let-7e-5p | CHD7     | CLASH | Functional MTI (Weak) |
| hsa-let-7e-5p | PYCR1    | CLASH | Functional MTI (Weak) |
| hsa-let-7e-5p | SMAP2    | CLASH | Functional MTI (Weak) |
| hsa-let-7e-5p | WDFY3    | CLASH | Functional MTI (Weak) |
| hsa-let-7e-5p | CRK      | CLASH | Functional MTI (Weak) |
| hsa-let-7e-5p | SRSF2    | CLASH | Functional MTI (Weak) |
| hsa-let-7e-5p | PGD      | CLASH | Functional MTI (Weak) |
| hsa-let-7e-5p | RMND5A   | CLASH | Functional MTI (Weak) |
| hsa-let-7e-5p | ZNF652   | CLASH | Functional MTI (Weak) |
| hsa-let-7e-5p | PSMA6    | CLASH | Functional MTI (Weak) |
| hsa-let-7e-5p | SLC38A2  | CLASH | Functional MTI (Weak) |
| hsa-let-7e-5p | LRRC41   | CLASH | Functional MTI (Weak) |
| hsa-let-7e-5p | RANBP2   | CLASH | Functional MTI (Weak) |
| hsa-let-7e-5p | SVIL     | CLASH | Functional MTI (Weak) |
| hsa-let-7e-5p | CCNG1    | CLASH | Functional MTI (Weak) |
| hsa-let-7e-5p | ZNF256   | CLASH | Functional MTI (Weak) |
| hsa-let-7e-5p | COPG1    | CLASH | Functional MTI (Weak) |
| hsa-let-7e-5p | PDCD11   | CLASH | Functional MTI (Weak) |



## Targeting AURKB for SKCM treatment

|               |          |       |                       |
|---------------|----------|-------|-----------------------|
| hsa-let-7e-5p | CNBP     | CLASH | Functional MTI (Weak) |
| hsa-let-7e-5p | USP37    | CLASH | Functional MTI (Weak) |
| hsa-let-7e-5p | UBE2V2   | CLASH | Functional MTI (Weak) |
| hsa-let-7e-5p | UBE2H    | CLASH | Functional MTI (Weak) |
| hsa-let-7e-5p | LMNA     | CLASH | Functional MTI (Weak) |
| hsa-let-7e-5p | STAT3    | CLASH | Functional MTI (Weak) |
| hsa-let-7e-5p | TRPV1    | CLASH | Functional MTI (Weak) |
| hsa-let-7e-5p | MATR3    | CLASH | Functional MTI (Weak) |
| hsa-let-7e-5p | HNRNPC   | CLASH | Functional MTI (Weak) |
| hsa-let-7e-5p | HS6ST2   | CLASH | Functional MTI (Weak) |
| hsa-let-7e-5p | WDR48    | CLASH | Functional MTI (Weak) |
| hsa-let-7e-5p | RBM8A    | CLASH | Functional MTI (Weak) |
| hsa-let-7e-5p | SCYL1    | CLASH | Functional MTI (Weak) |
| hsa-let-7e-5p | C19orf48 | CLASH | Functional MTI (Weak) |
| hsa-let-7e-5p | FOXD4L6  | CLASH | Functional MTI (Weak) |
| hsa-let-7e-5p | PIGN     | CLASH | Functional MTI (Weak) |
| hsa-let-7e-5p | SPCS3    | CLASH | Functional MTI (Weak) |
| hsa-let-7e-5p | TNFAIP1  | CLASH | Functional MTI (Weak) |
| hsa-let-7e-5p | MS4A10   | CLASH | Functional MTI (Weak) |
| hsa-let-7e-5p | MSM01    | CLASH | Functional MTI (Weak) |
| hsa-let-7e-5p | ARID1A   | CLASH | Functional MTI (Weak) |
| hsa-let-7e-5p | NCKIPSD  | CLASH | Functional MTI (Weak) |
| hsa-let-7e-5p | NCBP1    | CLASH | Functional MTI (Weak) |
| hsa-let-7e-5p | COX16    | CLASH | Functional MTI (Weak) |
| hsa-let-7e-5p | NUDT8    | CLASH | Functional MTI (Weak) |
| hsa-let-7e-5p | PHKA1    | CLASH | Functional MTI (Weak) |
| hsa-let-7e-5p | TXNRD1   | CLASH | Functional MTI (Weak) |
| hsa-let-7e-5p | ELMSAN1  | CLASH | Functional MTI (Weak) |
| hsa-let-7e-5p | CTSA     | CLASH | Functional MTI (Weak) |
| hsa-let-7e-5p | PRRC2A   | CLASH | Functional MTI (Weak) |
| hsa-let-7e-5p | SPAG9    | CLASH | Functional MTI (Weak) |
| hsa-let-7e-5p | AGMAT    | CLASH | Functional MTI (Weak) |
| hsa-let-7e-5p | NCKAP5L  | CLASH | Functional MTI (Weak) |
| hsa-let-7e-5p | ZFP62    | CLASH | Functional MTI (Weak) |
| hsa-let-7e-5p | EIF4EBP2 | CLASH | Functional MTI (Weak) |
| hsa-let-7e-5p | POLR3D   | CLASH | Functional MTI (Weak) |
| hsa-let-7e-5p | PRPF8    | CLASH | Functional MTI (Weak) |
| hsa-let-7e-5p | ATP6     | CLASH | Functional MTI (Weak) |

## Targeting AURKB for SKCM treatment

|               |          |       |                       |
|---------------|----------|-------|-----------------------|
| hsa-let-7e-5p | ZFAND5   | CLASH | Functional MTI (Weak) |
| hsa-let-7e-5p | BAZ1B    | CLASH | Functional MTI (Weak) |
| hsa-let-7e-5p | KATNAL1  | CLASH | Functional MTI (Weak) |
| hsa-let-7e-5p | BMP2K    | CLASH | Functional MTI (Weak) |
| hsa-let-7e-5p | SPN      | CLASH | Functional MTI (Weak) |
| hsa-let-7e-5p | PA2G4    | CLASH | Functional MTI (Weak) |
| hsa-let-7e-5p | RPRD2    | CLASH | Functional MTI (Weak) |
| hsa-let-7e-5p | TUBB4B   | CLASH | Functional MTI (Weak) |
| hsa-let-7e-5p | TRRAP    | CLASH | Functional MTI (Weak) |
| hsa-let-7e-5p | SLCO4A1  | CLASH | Functional MTI (Weak) |
| hsa-let-7e-5p | NOCT     | CLASH | Functional MTI (Weak) |
| hsa-let-7e-5p | USE1     | CLASH | Functional MTI (Weak) |
| hsa-let-7e-5p | STARD7   | CLASH | Functional MTI (Weak) |
| hsa-let-7e-5p | CLTC     | CLASH | Functional MTI (Weak) |
| hsa-let-7e-5p | TERF1    | CLASH | Functional MTI (Weak) |
| hsa-let-7e-5p | PAX3     | CLASH | Functional MTI (Weak) |
| hsa-let-7e-5p | CCDC97   | CLASH | Functional MTI (Weak) |
| hsa-let-7e-5p | HLA-C    | CLASH | Functional MTI (Weak) |
| hsa-let-7e-5p | GTPBP8   | CLASH | Functional MTI (Weak) |
| hsa-let-7e-5p | VGLL4    | CLASH | Functional MTI (Weak) |
| hsa-let-7e-5p | ANKRD40  | CLASH | Functional MTI (Weak) |
| hsa-let-7e-5p | HNRNPUL1 | CLASH | Functional MTI (Weak) |
| hsa-let-7e-5p | ND1      | CLASH | Functional MTI (Weak) |
| hsa-let-7e-5p | DSP      | CLASH | Functional MTI (Weak) |
| hsa-let-7e-5p | ZNF805   | CLASH | Functional MTI (Weak) |
| hsa-let-7e-5p | RBBP4    | CLASH | Functional MTI (Weak) |
| hsa-let-7e-5p | OCLN     | CLASH | Functional MTI (Weak) |
| hsa-let-7e-5p | AMPD2    | CLASH | Functional MTI (Weak) |
| hsa-let-7e-5p | MKI67    | CLASH | Functional MTI (Weak) |
| hsa-let-7e-5p | SUB1     | CLASH | Functional MTI (Weak) |
| hsa-let-7e-5p | RSL1D1   | CLASH | Functional MTI (Weak) |
| hsa-let-7e-5p | SEC23IP  | CLASH | Functional MTI (Weak) |
| hsa-let-7e-5p | RNMT     | CLASH | Functional MTI (Weak) |
| hsa-let-7e-5p | SGSM3    | CLASH | Functional MTI (Weak) |
| hsa-let-7e-5p | ZFP3     | CLASH | Functional MTI (Weak) |
| hsa-let-7e-5p | GLUL     | CLASH | Functional MTI (Weak) |
| hsa-let-7e-5p | POLD1    | CLASH | Functional MTI (Weak) |
| hsa-let-7e-5p | WDR4     | CLASH | Functional MTI (Weak) |

## Targeting AURKB for SKCM treatment

|               |          |       |                       |
|---------------|----------|-------|-----------------------|
| hsa-let-7e-5p | PPP1R2   | CLASH | Functional MTI (Weak) |
| hsa-let-7e-5p | RAI2     | CLASH | Functional MTI (Weak) |
| hsa-let-7e-5p | PLCXD1   | CLASH | Functional MTI (Weak) |
| hsa-let-7e-5p | UTP15    | CLASH | Functional MTI (Weak) |
| hsa-let-7e-5p | THADA    | CLASH | Functional MTI (Weak) |
| hsa-let-7e-5p | ZNF451   | CLASH | Functional MTI (Weak) |
| hsa-let-7e-5p | CREBBP   | CLASH | Functional MTI (Weak) |
| hsa-let-7e-5p | ZNF770   | CLASH | Functional MTI (Weak) |
| hsa-let-7e-5p | CLDN4    | CLASH | Functional MTI (Weak) |
| hsa-let-7e-5p | ZKSCAN7  | CLASH | Functional MTI (Weak) |
| hsa-let-7e-5p | NICN1    | CLASH | Functional MTI (Weak) |
| hsa-let-7e-5p | RPLP2    | CLASH | Functional MTI (Weak) |
| hsa-let-7e-5p | DCBLD2   | CLASH | Functional MTI (Weak) |
| hsa-let-7e-5p | CA5B     | CLASH | Functional MTI (Weak) |
| hsa-let-7e-5p | COX14    | CLASH | Functional MTI (Weak) |
| hsa-let-7e-5p | PSD3     | CLASH | Functional MTI (Weak) |
| hsa-let-7e-5p | RPL27A   | CLASH | Functional MTI (Weak) |
| hsa-let-7e-5p | CWC15    | CLASH | Functional MTI (Weak) |
| hsa-let-7e-5p | NT5DC2   | CLASH | Functional MTI (Weak) |
| hsa-let-7e-5p | OR7D2    | CLASH | Functional MTI (Weak) |
| hsa-let-7e-5p | HIF1AN   | CLASH | Functional MTI (Weak) |
| hsa-let-7e-5p | NUDT15   | CLASH | Functional MTI (Weak) |
| hsa-let-7e-5p | CDH18    | CLASH | Functional MTI (Weak) |
| hsa-let-7e-5p | FAM160B1 | CLASH | Functional MTI (Weak) |
| hsa-let-7e-5p | DZIP1    | CLASH | Functional MTI (Weak) |
| hsa-let-7e-5p | TDRD7    | CLASH | Functional MTI (Weak) |
| hsa-let-7e-5p | TCF4     | CLASH | Functional MTI (Weak) |
| hsa-let-7e-5p | ENSA     | CLASH | Functional MTI (Weak) |
| hsa-let-7e-5p | GTF3C1   | CLASH | Functional MTI (Weak) |
| hsa-let-7e-5p | TNFRSF1A | CLASH | Functional MTI (Weak) |
| hsa-let-7e-5p | CCDC113  | CLASH | Functional MTI (Weak) |
| hsa-let-7e-5p | MYO9B    | CLASH | Functional MTI (Weak) |
| hsa-let-7e-5p | COX10    | CLASH | Functional MTI (Weak) |
| hsa-let-7e-5p | PRAMEF13 | CLASH | Functional MTI (Weak) |
| hsa-let-7e-5p | MRPS2    | CLASH | Functional MTI (Weak) |
| hsa-let-7e-5p | RACGAP1  | CLASH | Functional MTI (Weak) |
| hsa-let-7e-5p | CCDC106  | CLASH | Functional MTI (Weak) |
| hsa-let-7e-5p | CYP2B6   | CLASH | Functional MTI (Weak) |

## Targeting AURKB for SKCM treatment

|               |         |                                                                                                           |                       |
|---------------|---------|-----------------------------------------------------------------------------------------------------------|-----------------------|
| hsa-let-7e-5p | PSME4   | CLASH                                                                                                     | Functional MTI (Weak) |
| hsa-let-7e-5p | SETD1A  | CLASH                                                                                                     | Functional MTI (Weak) |
| hsa-let-7e-5p | PLK1    | Microarray//qRT-PCR//Western blot                                                                         | Functional MTI        |
| hsa-let-7e-5p | TNFAIP3 | Luciferase reporter assay//Western blot                                                                   | Functional MTI        |
| hsa-let-7e-5p | IGF1R   | Luciferase reporter assay//qRT-PCR//Western blot                                                          | Functional MTI        |
| hsa-let-7e-5p | MMP9    | Luciferase reporter assay//qRT-PCR//Western blot                                                          | Functional MTI        |
| hsa-let-7e-5p | IGF1    | Luciferase reporter assay//qRT-PCR//Western blot                                                          | Functional MTI        |
| hsa-let-7e-5p | ARID3A  | Luciferase reporter assay//qRT-PCR//Western blot                                                          | Functional MTI        |
| hsa-let-7e-5p | LIN28A  | Luciferase reporter assay//Microarray//qRT-PCR//Western blot                                              | Functional MTI        |
| hsa-let-7e-5p | AURKB   | Luciferase reporter assay//Microarray//qRT-PCR//Western blot                                              | Functional MTI        |
| hsa-let-7e-5p | SMC1A   | Luciferase reporter assay//Reporter assay; Other                                                          | Functional MTI        |
| hsa-let-7e-5p | EIF3J   | Luciferase reporter assay//Reporter assay                                                                 | Non-Functional MTI    |
| hsa-let-7e-5p | HMGA2   | Luciferase reporter assay//qRT-PCR                                                                        | Functional MTI        |
| hsa-let-7e-5p | MPL     | Luciferase reporter assay                                                                                 | Non-Functional MTI    |
| hsa-let-7e-5p | FASLG   | Luciferase reporter assay                                                                                 | Functional MTI        |
| hsa-let-7e-5p | AGO1    | Immunohistochemistry//Immunoprecipitaion//Luciferase reporter assay//Northern blot//qRT-PCR//Western blot | Functional MTI        |
| hsa-let-7e-5p | WNT1    | Flow//Immunoblot//Luciferase reporter assay//Microarray//qRT-PCR                                          | Functional MTI        |

## Targeting AURKB for SKCM treatment

**Supplementary Table 3.** List of differentially expressed genes (DEGs) between AZD2511 treatment and control group

| Gene symbol | Gene title                                                  | logFC | Adj P-value | P-value  | t-statistic |
|-------------|-------------------------------------------------------------|-------|-------------|----------|-------------|
| Upregulated |                                                             |       |             |          |             |
| GINS2       | GINS complex subunit 2                                      | 1.96  | 3.48E-14    | 2.94E-18 | 2.42E+01    |
| CDC45       | cell division cycle 45                                      | 1.88  | 2.93E-13    | 4.33E-17 | 2.15E+01    |
| E2F2        | E2F transcription factor 2                                  | 1.8   | 8.61E-13    | 2.73E-16 | 1.98E+01    |
| CCL2        | C-C motif chemokine ligand 2                                | 1.72  | 2.93E-13    | 3.72E-17 | 2.17E+01    |
| CDCA5       | cell division cycle associated 5                            | 1.65  | 3.54E-13    | 6.74E-17 | 2.11E+01    |
| CHAF1B      | chromatin assembly factor 1 subunit B                       | 1.63  | 1.03E-11    | 8.69E-15 | 1.70E+01    |
| POLA2       | DNA polymerase alpha 2, accessory subunit                   | 1.59  | 4.23E-12    | 2.15E-15 | 1.81E+01    |
| RRM2        | ribonucleotide reductase regulatory subunit M2              | 1.58  | 2.04E-10    | 4.36E-13 | 1.42E+01    |
| ATAD2       | ATPase family, AAA domain containing 2                      | 1.5   | 5.31E-12    | 3.21E-15 | 1.78E+01    |
| FAM83D      | family with sequence similarity 83 member D                 | 1.48  | 7.13E-12    | 4.97E-15 | 1.74E+01    |
| MCM5        | Minichromosome maintenance complex component 5              | 1.47  | 3.20E-12    | 1.49E-15 | 1.84E+01    |
| DTL         | Denticle less E3 ubiquitin protein ligase homolog           | 1.46  | 7.37E-12    | 5.36E-15 | 1.73E+01    |
| CDT1        | chromatin licensing and DNA replication factor 1            | 1.46  | 4.30E-11    | 6.14E-14 | 1.55E+01    |
| AURKB       | aurora kinase B                                             | 1.45  | 5.31E-12    | 3.33E-15 | 1.77E+01    |
| DNAJC9      | DnaJ heat shock protein family (Hsp40) member C9            | 1.45  | 8.92E-12    | 7.35E-15 | 1.71E+01    |
| RAD51AP1    | RAD51 associated protein 1                                  | 1.45  | 1.07E-10    | 1.97E-13 | 1.47E+01    |
| DDIAS       | DNA damage induced apoptosis suppressor                     | 1.44  | 6.74E-12    | 4.56E-15 | 1.75E+01    |
| GINS3       | GINS complex subunit 3                                      | 1.44  | 5.58E-11    | 8.96E-14 | 1.53E+01    |
| MCM2        | minichromosome maintenance complex component 2              | 1.41  | 1.17E-11    | 1.11E-14 | 1.68E+01    |
| C1orf112    | chromosome 1 open reading frame 112                         | 1.38  | 4.98E-12    | 2.84E-15 | 1.78E+01    |
| STIL        | SCL/TAL1 interrupting locus                                 | 1.35  | 5.81E-11    | 9.46E-14 | 1.52E+01    |
| CENPU       | centromere protein U                                        | 1.35  | 6.57E-10    | 2.07E-12 | 1.32E+01    |
| BARD1       | BRCA1 associated RING domain 1                              | 1.35  | 2.56E-09    | 1.16E-11 | 1.21E+01    |
| NCAPG       | non-SMC condensin I complex subunit G                       | 1.34  | 3.29E-11    | 4.26E-14 | 1.58E+01    |
| MCM10       | minichromosome maintenance 10 replication initiation factor | 1.34  | 4.30E-11    | 6.27E-14 | 1.55E+01    |
| RNASEH2A    | ribonuclease H2 subunit A                                   | 1.33  | 1.63E-11    | 1.66E-14 | 1.65E+01    |
| TK1         | thymidine kinase 1                                          | 1.33  | 1.65E-10    | 3.21E-13 | 1.44E+01    |
| KIFC1       | kinesin family member C1                                    | 1.33  | 2.47E-10    | 5.89E-13 | 1.40E+01    |
| CXCL1       | C-X-C motif chemokine ligand 1                              | 1.33  | 8.44E-09    | 5.10E-11 | 1.13E+01    |
| SKA3        | spindle and kinetochore associated complex subunit 3        | 1.32  | 2.40E-11    | 2.73E-14 | 1.61E+01    |
| MCM6        | minichromosome maintenance complex component 6              | 1.31  | 2.95E-11    | 3.75E-14 | 1.59E+01    |
| PRIM1       | primase (DNA) subunit 1                                     | 1.29  | 6.17E-11    | 1.03E-13 | 1.52E+01    |

## Targeting AURKB for SKCM treatment

|         |                                                                  |      |          |          |          |
|---------|------------------------------------------------------------------|------|----------|----------|----------|
| MCM4    | minichromosome maintenance complex component 4                   | 1.27 | 1.65E-11 | 1.70E-14 | 1.65E+01 |
| ID3     | inhibitor of DNA binding 3, HLH protein                          | 1.27 | 3.56E-10 | 9.71E-13 | 1.36E+01 |
| CDC20   | cell division cycle 20                                           | 1.27 | 3.92E-10 | 1.08E-12 | 1.36E+01 |
| TACC3   | transforming acidic coiled-coil containing protein 3             | 1.26 | 6.17E-11 | 1.03E-13 | 1.52E+01 |
| RAD54L  | RAD54-like ( <i>S. cerevisiae</i> )                              | 1.26 | 2.55E-10 | 6.31E-13 | 1.39E+01 |
| POLE2   | DNA polymerase epsilon 2, accessory subunit                      | 1.25 | 4.64E-11 | 7.16E-14 | 1.54E+01 |
| TRIP13  | thyroid hormone receptor interactor 13                           | 1.25 | 2.17E-10 | 4.81E-13 | 1.41E+01 |
| MELK    | maternal embryonic leucine zipper kinase                         | 1.25 | 2.21E-10 | 5.05E-13 | 1.41E+01 |
| CCNA2   | cyclin A2                                                        | 1.24 | 3.47E-10 | 9.40E-13 | 1.37E+01 |
| ASF1B   | anti-silencing function 1B histone chaperone                     | 1.24 | 1.78E-09 | 7.23E-12 | 1.24E+01 |
| SUV39H1 | suppressor of variegation 3-9 homolog 1                          | 1.23 | 4.13E-11 | 5.68E-14 | 1.56E+01 |
| POLQ    | DNA polymerase theta                                             | 1.23 | 8.74E-11 | 1.54E-13 | 1.49E+01 |
| RPA2    | replication protein A2                                           | 1.23 | 1.61E-09 | 6.31E-12 | 1.25E+01 |
| CDCA3   | cell division cycle associated 3                                 | 1.22 | 8.74E-11 | 1.55E-13 | 1.49E+01 |
| PLK4    | polo like kinase 4                                               | 1.22 | 2.04E-10 | 4.40E-13 | 1.42E+01 |
| DSCC1   | DNA replication and sister chromatid cohesion 1                  | 1.22 | 2.94E-09 | 1.39E-11 | 1.20E+01 |
| IL6     | interleukin 6                                                    | 1.21 | 1.22E-10 | 2.30E-13 | 1.46E+01 |
| HIRIP3  | HIRA interacting protein 3                                       | 1.21 | 1.66E-09 | 6.65E-12 | 1.24E+01 |
| KIF11   | kinesin family member 11                                         | 1.21 | 1.84E-09 | 7.63E-12 | 1.24E+01 |
| GEMIN4  | gem nuclear organelle associated protein 4                       | 1.2  | 4.40E-11 | 6.51E-14 | 1.55E+01 |
| CCNF    | cyclin F                                                         | 1.2  | 2.64E-10 | 6.64E-13 | 1.39E+01 |
| MCM3    | minichromosome maintenance complex component 3                   | 1.2  | 2.98E-10 | 7.62E-13 | 1.38E+01 |
| CDCA8   | cell division cycle associated 8                                 | 1.2  | 9.06E-10 | 3.06E-12 | 1.29E+01 |
| USP1    | ubiquitin specific peptidase 1                                   | 1.2  | 1.57E-09 | 6.09E-12 | 1.25E+01 |
| CHAF1A  | chromatin assembly factor 1 subunit A                            | 1.2  | 1.64E-09 | 6.48E-12 | 1.25E+01 |
| CDK1    | cyclin dependent kinase 1                                        | 1.19 | 3.14E-09 | 1.50E-11 | 1.20E+01 |
| KIF22   | kinesin family member 22                                         | 1.18 | 6.57E-10 | 2.05E-12 | 1.32E+01 |
| S100A3  | S100 calcium binding protein A3                                  | 1.17 | 1.73E-10 | 3.56E-13 | 1.43E+01 |
| FANCG   | Fanconi anemia complementation group G                           | 1.17 | 3.14E-10 | 8.09E-13 | 1.38E+01 |
| SKP2    | S-phase kinase-associated protein 2, E3 ubiquitin protein ligase | 1.16 | 6.76E-10 | 2.14E-12 | 1.31E+01 |
| NUP85   | nucleoporin 85                                                   | 1.16 | 1.43E-09 | 5.27E-12 | 1.26E+01 |
| SPDL1   | spindle apparatus coiled-coil protein 1                          | 1.16 | 1.43E-09 | 5.34E-12 | 1.26E+01 |
| CBX2    | chromobox 2                                                      | 1.15 | 4.62E-10 | 1.30E-12 | 1.35E+01 |
| MASTL   | microtubule associated serine/threonine kinase like              | 1.13 | 4.71E-10 | 1.33E-12 | 1.34E+01 |
| POLA1   | DNA polymerase alpha 1, catalytic subunit                        | 1.13 | 4.92E-10 | 1.41E-12 | 1.34E+01 |

## Targeting AURKB for SKCM treatment

|          |                                                                        |      |          |          |          |
|----------|------------------------------------------------------------------------|------|----------|----------|----------|
| POC1A    | POC1 centriolar protein A                                              | 1.12 | 2.68E-10 | 6.80E-13 | 1.39E+01 |
| RFWD3    | ring finger and WD repeat domain 3                                     | 1.12 | 3.32E-10 | 8.70E-13 | 1.37E+01 |
| HIST1H4C | histone cluster 1, H4c                                                 | 1.12 | 4.74E-10 | 1.35E-12 | 1.34E+01 |
| AUNIP    | aurora kinase A and ninein interacting protein                         | 1.12 | 7.17E-10 | 2.30E-12 | 1.31E+01 |
| TOP2A    | topoisomerase (DNA) II alpha                                           | 1.12 | 1.46E-09 | 5.54E-12 | 1.26E+01 |
| UBE2T    | ubiquitin conjugating enzyme E2 T                                      | 1.11 | 3.97E-10 | 1.11E-12 | 1.36E+01 |
| SPC25    | SPC25, NDC80 kinetochore complex component                             | 1.11 | 6.36E-10 | 1.98E-12 | 1.32E+01 |
| LRR1     | leucine rich repeat protein 1                                          | 1.11 | 1.43E-09 | 5.27E-12 | 1.26E+01 |
| CDCA2    | cell division cycle associated 2                                       | 1.11 | 2.27E-09 | 1.00E-11 | 1.22E+01 |
| CKAP2L   | cytoskeleton associated protein 2 like                                 | 1.11 | 3.24E-09 | 1.56E-11 | 1.19E+01 |
| C17orf53 | chromosome 17 open reading frame 53                                    | 1.11 | 4.44E-09 | 2.27E-11 | 1.17E+01 |
| CCDC34   | coiled-coil domain containing 34                                       | 1.1  | 9.34E-10 | 3.20E-12 | 1.29E+01 |
| ORC6     | origin recognition complex subunit 6                                   | 1.1  | 1.91E-09 | 8.05E-12 | 1.23E+01 |
| CEP55    | centrosomal protein 55                                                 | 1.09 | 5.68E-10 | 1.73E-12 | 1.33E+01 |
| C16orf59 | chromosome 16 open reading frame 59                                    | 1.09 | 1.46E-09 | 5.46E-12 | 1.26E+01 |
| LMNB2    | lamin B2                                                               | 1.08 | 3.30E-10 | 8.59E-13 | 1.37E+01 |
| IL7R     | interleukin 7 receptor                                                 | 1.08 | 9.89E-10 | 3.41E-12 | 1.29E+01 |
| MCMBP    | minichromosome maintenance complex binding protein                     | 1.08 | 1.02E-09 | 3.55E-12 | 1.28E+01 |
| TPX2     | TPX2, microtubule nucleation factor                                    | 1.08 | 1.06E-09 | 3.73E-12 | 1.28E+01 |
| NUSAP1   | nucleolar and spindle associated protein 1                             | 1.08 | 1.47E-09 | 5.58E-12 | 1.26E+01 |
| RMI1     | RecQ mediated genome instability 1                                     | 1.07 | 5.46E-10 | 1.60E-12 | 1.33E+01 |
| MID1     | midline 1                                                              | 1.07 | 7.22E-10 | 2.35E-12 | 1.31E+01 |
| BUB1     | BUB1 mitotic checkpoint serine/threonine kinase                        | 1.07 | 1.08E-09 | 3.82E-12 | 1.28E+01 |
| FAM19A3  | family with sequence similarity 19 member A3, C-C motif chemokine like | 1.07 | 1.49E-09 | 5.72E-12 | 1.25E+01 |
| FANCI    | Fanconi anemia complementation group I                                 | 1.07 | 1.81E-09 | 7.44E-12 | 1.24E+01 |
| ZWINT    | ZW10 interacting kinetochore protein                                   | 1.07 | 2.11E-09 | 9.04E-12 | 1.23E+01 |
| CHEK1    | checkpoint kinase 1                                                    | 1.06 | 1.46E-09 | 5.51E-12 | 1.26E+01 |
| TIMELESS | timeless circadian clock                                               | 1.06 | 2.00E-09 | 8.47E-12 | 1.23E+01 |
| TEX30    | testis expressed 30                                                    | 1.06 | 2.16E-09 | 9.34E-12 | 1.22E+01 |
| GTSE1    | G2 and S-phase expressed 1                                             | 1.06 | 7.35E-09 | 4.25E-11 | 1.14E+01 |
| GMNN     | geminin, DNA replication inhibitor                                     | 1.06 | 1.62E-08 | 1.15E-10 | 1.08E+01 |
| CDKN3    | cyclin dependent kinase inhibitor 3                                    | 1.05 | 7.46E-10 | 2.46E-12 | 1.31E+01 |
| KNTC1    | kinetochore associated 1                                               | 1.05 | 8.32E-10 | 2.78E-12 | 1.30E+01 |
| TIPIN    | TIMELESS interacting protein                                           | 1.04 | 5.54E-10 | 1.64E-12 | 1.33E+01 |
| FN3KRP   | fructosamine 3 kinase related protein                                  | 1.04 | 2.64E-09 | 1.22E-11 | 1.21E+01 |

## Targeting AURKB for SKCM treatment

|               |                                                           |       |          |          |           |
|---------------|-----------------------------------------------------------|-------|----------|----------|-----------|
| RMI2          | RecQ mediated genome instability 2                        | 1.03  | 7.22E-10 | 2.34E-12 | 1.31E+01  |
| AURKA         | aurora kinase A                                           | 1.03  | 1.79E-09 | 7.30E-12 | 1.24E+01  |
| RANGAP1       | Ran GTPase activating protein 1                           | 1.03  | 3.26E-09 | 1.58E-11 | 1.19E+01  |
| C19orf48      | chromosome 19 open reading frame 48                       | 1.02  | 1.61E-09 | 6.26E-12 | 1.25E+01  |
| SAAL1         | serum amyloid A like 1                                    | 1.02  | 2.23E-09 | 9.82E-12 | 1.22E+01  |
| BLM           | Bloom syndrome RecQ like helicase                         | 1.02  | 6.99E-09 | 3.96E-11 | 1.14E+01  |
| CCDC138       | coiled-coil domain containing 138                         | 1.01  | 2.61E-09 | 1.20E-11 | 1.21E+01  |
| FOXM1         | forkhead box M1                                           | 1.01  | 3.74E-09 | 1.87E-11 | 1.18E+01  |
| HJURP         | Holliday junction recognition protein                     | 1.01  | 3.86E-09 | 1.96E-11 | 1.18E+01  |
| Downregulated |                                                           |       |          |          |           |
| GDF15         | growth differentiation factor 15                          | -2.59 | 3.44E-16 | 7.27E-21 | -3.14E+01 |
| TRIB3         | tribbles pseudokinase 3                                   | -2.08 | 1.70E-12 | 7.20E-16 | -1.90E+01 |
| DNAJB9        | DnaJ heat shock protein family (Hsp40) member B9          | -1.93 | 3.54E-13 | 6.73E-17 | -2.11E+01 |
| DDIT3         | DNA damage inducible transcript 3                         | -1.92 | 4.92E-13 | 1.14E-16 | -2.06E+01 |
| HMGCS1        | 3-hydroxy-3-methylglutaryl-CoA synthase 1                 | -1.8  | 5.14E-13 | 1.41E-16 | -2.04E+01 |
| HSPA5         | heat shock protein family A (Hsp70) member 5              | -1.71 | 5.14E-13 | 1.41E-16 | -2.04E+01 |
| ITIH6         | inter-alpha-trypsin inhibitor heavy chain family member 6 | -1.71 | 8.50E-12 | 6.83E-15 | -1.72E+01 |
| C11orf96      | chromosome 11 open reading frame 96                       | -1.61 | 1.94E-12 | 8.62E-16 | -1.88E+01 |
| PTPRZ1        | protein tyrosine phosphatase, receptor type Z1            | -1.5  | 1.76E-11 | 1.90E-14 | -1.64E+01 |
| MSMO1         | methylsterol monooxygenase 1                              | -1.5  | 2.28E-10 | 5.35E-13 | -1.40E+01 |
| FABP7         | fatty acid binding protein 7                              | -1.49 | 2.77E-11 | 3.46E-14 | -1.59E+01 |
| PLA1A         | phospholipase A1 member A                                 | -1.45 | 8.50E-12 | 6.82E-15 | -1.72E+01 |
| CPVL          | carboxypeptidase, vitellogenic like                       | -1.43 | 4.57E-12 | 2.50E-15 | -1.80E+01 |
| INSIG1        | insulin induced gene 1                                    | -1.41 | 1.87E-11 | 2.06E-14 | -1.63E+01 |
| ATF4          | activating transcription factor 4                         | -1.4  | 1.64E-09 | 6.46E-12 | -1.25E+01 |
| DDIT4         | DNA damage inducible transcript 4                         | -1.38 | 2.42E-11 | 2.81E-14 | -1.61E+01 |
| WIPI1         | WD repeat domain, phosphoinositide interacting 1          | -1.37 | 5.43E-10 | 1.58E-12 | -1.33E+01 |
| RPS6KA2       | ribosomal protein S6 kinase A2                            | -1.36 | 4.64E-11 | 7.17E-14 | -1.54E+01 |
| ASNS          | asparagine synthetase (glutamine-hydrolyzing)             | -1.33 | 3.29E-11 | 4.35E-14 | -1.58E+01 |
| WARS          | tryptophanyl-tRNA synthetase                              | -1.33 | 4.64E-11 | 7.04E-14 | -1.54E+01 |
| CRELD1        | cysteine rich with EGF like domains 1                     | -1.32 | 3.81E-11 | 5.16E-14 | -1.56E+01 |
| SQLE          | squalene epoxidase                                        | -1.3  | 1.63E-11 | 1.65E-14 | -1.65E+01 |
| A2M           | alpha-2-macroglobulin                                     | -1.29 | 3.29E-11 | 4.38E-14 | -1.58E+01 |
| PSAT1         | phosphoserine aminotransferase 1                          | -1.29 | 2.94E-09 | 1.38E-11 | -1.20E+01 |
| GOLGB1        | golgin B1                                                 | -1.29 | 6.88E-09 | 3.87E-11 | -1.14E+01 |



## Targeting AURKB for SKCM treatment

|          |                                                                  |       |          |          |           |
|----------|------------------------------------------------------------------|-------|----------|----------|-----------|
| MCF2L    | MCF.2 cell line derived transforming sequence like               | -1.27 | 1.01E-10 | 1.82E-13 | -1.48E+01 |
| LBH      | limb bud and heart development                                   | -1.27 | 2.10E-10 | 4.56E-13 | -1.41E+01 |
| TAC1     | tachykinin precursor 1                                           | -1.23 | 1.73E-10 | 3.48E-13 | -1.43E+01 |
| COG6     | component of oligomeric golgi complex 6                          | -1.22 | 1.07E-10 | 1.96E-13 | -1.47E+01 |
| RFTN2    | raftlin family member 2                                          | -1.21 | 4.79E-11 | 7.49E-14 | -1.54E+01 |
| ENPP2    | ectonucleotide pyrophosphatase/phosphodiesterase 2               | -1.21 | 1.73E-10 | 3.54E-13 | -1.43E+01 |
| TRIM9    | tripartite motif containing 9                                    | -1.21 | 2.04E-10 | 4.38E-13 | -1.42E+01 |
| SCRG1    | stimulator of chondrogenesis 1                                   | -1.21 | 6.20E-10 | 1.91E-12 | -1.32E+01 |
| FAM198B  | family with sequence similarity 198 member B                     | -1.2  | 2.11E-09 | 9.05E-12 | -1.23E+01 |
| CYFIP2   | cytoplasmic FMR1 interacting protein 2                           | -1.18 | 1.73E-10 | 3.49E-13 | -1.43E+01 |
| TRIM51   | tripartite motif-containing 51                                   | -1.16 | 1.75E-10 | 3.63E-13 | -1.43E+01 |
| PRR4     | proline rich 4 (lacrimal)                                        | -1.16 | 1.16E-09 | 4.15E-12 | -1.27E+01 |
| MGP      | matrix Gla protein                                               | -1.15 | 2.42E-09 | 1.09E-11 | -1.22E+01 |
| MEG3     | maternally expressed 3 (non-protein coding)                      | -1.15 | 3.40E-09 | 1.67E-11 | -1.19E+01 |
| SEC24D   | SEC24 homolog D, COPII coat complex component                    | -1.15 | 5.53E-09 | 2.97E-11 | -1.16E+01 |
| PDGFRL   | platelet derived growth factor receptor like                     | -1.14 | 2.23E-10 | 5.19E-13 | -1.41E+01 |
| LDB2     | LIM domain binding 2                                             | -1.14 | 2.48E-10 | 5.98E-13 | -1.40E+01 |
| SLC22A18 | solute carrier family 22 member 18                               | -1.14 | 1.75E-09 | 7.04E-12 | -1.24E+01 |
| CHI3L2   | chitinase 3 like 2                                               | -1.13 | 5.43E-10 | 1.58E-12 | -1.33E+01 |
| BRSK1    | BR serine/threonine kinase 1                                     | -1.13 | 5.63E-10 | 1.70E-12 | -1.33E+01 |
| MMP16    | matrix metalloproteinase 16                                      | -1.13 | 3.41E-09 | 1.68E-11 | -1.19E+01 |
| HYOU1    | hypoxia up-regulated 1                                           | -1.12 | 5.63E-10 | 1.70E-12 | -1.33E+01 |
| DHCR7    | 7-dehydrocholesterol reductase                                   | -1.12 | 8.32E-10 | 2.76E-12 | -1.30E+01 |
| IRS2     | insulin receptor substrate 2                                     | -1.12 | 1.19E-08 | 7.70E-11 | -1.10E+01 |
| PCK2     | phosphoenolpyruvate carboxykinase 2, mitochondrial               | -1.12 | 1.21E-08 | 7.91E-11 | -1.10E+01 |
| SLC2A3   | solute carrier family 2 member 3                                 | -1.1  | 1.00E-08 | 6.17E-11 | -1.12E+01 |
| TRPM8    | transient receptor potential cation channel subfamily M member 8 | -1.1  | 1.72E-08 | 1.24E-10 | -1.08E+01 |
| SPATA13  | spermatogenesis associated 13                                    | -1.1  | 8.90E-08 | 9.16E-10 | -9.73     |
| LOXL4    | lysyl oxidase like 4                                             | -1.09 | 2.35E-10 | 5.57E-13 | -1.40E+01 |
| CTH      | cystathionine gamma-lyase                                        | -1.09 | 6.49E-09 | 3.61E-11 | -1.15E+01 |
| STAT2    | signal transducer and activator of transcription 2               | -1.08 | 1.31E-09 | 4.78E-12 | -1.26E+01 |
| NCALD    | neurocalcin delta                                                | -1.08 | 2.57E-09 | 1.17E-11 | -1.21E+01 |
| COL9A1   | collagen type IX alpha 1 chain                                   | -1.07 | 1.89E-09 | 7.91E-12 | -1.23E+01 |
| SARS     | seryl-tRNA synthetase                                            | -1.07 | 6.99E-09 | 3.96E-11 | -1.14E+01 |
| COL15A1  | collagen type XV alpha 1 chain                                   | -1.06 | 2.34E-09 | 1.04E-11 | -1.22E+01 |

## Targeting AURKB for SKCM treatment

|         |                                                     |       |          |          |           |
|---------|-----------------------------------------------------|-------|----------|----------|-----------|
| INMT    | indolethylamine N-methyltransferase                 | -1.06 | 6.38E-09 | 3.54E-11 | -1.15E+01 |
| SYVN1   | synoviolin 1                                        | -1.05 | 9.34E-10 | 3.19E-12 | -1.29E+01 |
| SCN4B   | sodium voltage-gated channel beta subunit 4         | -1.05 | 2.50E-09 | 1.13E-11 | -1.21E+01 |
| CBS     | cystathionine-beta-synthase                         | -1.05 | 1.08E-08 | 6.80E-11 | -1.11E+01 |
| PMP2    | peripheral myelin protein 2                         | -1.05 | 1.61E-08 | 1.13E-10 | -1.08E+01 |
| TMEM39A | transmembrane protein 39A                           | -1.05 | 4.73E-08 | 4.12E-10 | -1.01E+01 |
| CAMK2B  | calcium/calmodulin dependent protein kinase II beta | -1.04 | 7.02E-10 | 2.24E-12 | -1.31E+01 |
| YPEL5   | yippee like 5                                       | -1.04 | 7.31E-10 | 2.40E-12 | -1.31E+01 |
| MAGED2  | MAGE family member D2                               | -1.04 | 1.02E-09 | 3.57E-12 | -1.28E+01 |
| CRELD2  | cysteine rich with EGF like domains 2               | -1.04 | 1.32E-09 | 4.84E-12 | -1.26E+01 |
| MXD4    | MAX dimerization protein 4                          | -1.04 | 4.90E-09 | 2.54E-11 | -1.17E+01 |
| TRIL    | TLR4 interactor with leucine rich repeats           | -1.04 | 5.36E-09 | 2.84E-11 | -1.16E+01 |
| SPATA18 | spermatogenesis associated 18                       | -1.04 | 1.30E-08 | 8.62E-11 | -1.10E+01 |
| NPPC    | natriuretic peptide C                               | -1.04 | 2.16E-08 | 1.64E-10 | -1.06E+01 |
| TMED10  | transmembrane p24 trafficking protein 10            | -1.04 | 2.97E-08 | 2.38E-10 | -1.04E+01 |
| ZMAT3   | zinc finger matrin-type 3                           | -1.03 | 1.86E-09 | 7.76E-12 | -1.24E+01 |
| SC5D    | sterol-C5-desaturase                                | -1.03 | 2.66E-09 | 1.24E-11 | -1.21E+01 |
| KANK1   | KN motif and ankyrin repeat domains 1               | -1.02 | 1.78E-08 | 1.29E-10 | -1.08E+01 |
| NINJ2   | ninjurin 2                                          | -1.01 | 1.82E-09 | 7.48E-12 | -1.24E+01 |
| ARMCX3  | armadillo repeat containing, X-linked 3             | -1.01 | 2.94E-09 | 1.38E-11 | -1.20E+01 |
| SDF2L1  | stromal cell derived factor 2 like 1                | -1.01 | 8.44E-09 | 5.10E-11 | -1.13E+01 |
| SEMA5A  | semaphorin 5A                                       | -1.01 | 1.19E-08 | 7.75E-11 | -1.10E+01 |
| SSPO    | SCO-spondin                                         | -1.01 | 1.92E-08 | 1.43E-10 | -1.07E+01 |

## Targeting AURKB for SKCM treatment

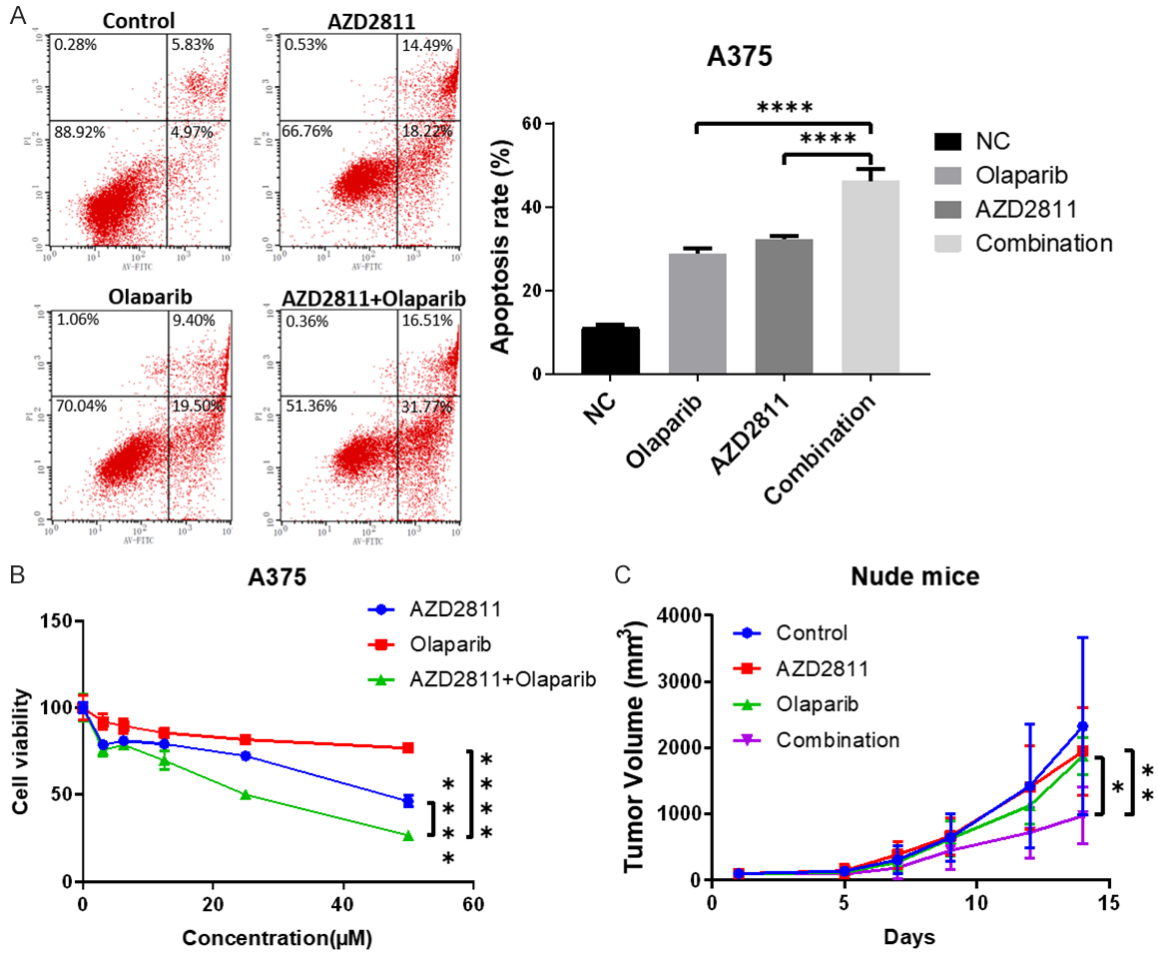

**Supplementary Figure 1.** Anti-melanoma effect from the combination of PARPi and AURKB inhibition validated in A375 cell line and nude mice model. A. Flow cytometry analysis in A375 cells treated with AZD2811, Olaparib and AZD2811+Olaparib, and percentage of apoptotic A375 cells are shown. Data represent means  $\pm$  SD. \*\*\*\* $P < 0.0001$ . B. The cell viability of A375 cells by MTS cell proliferation assay. Data represent means  $\pm$  SD. \*\*\*\* $P < 0.0001$ . C. The tumor size in the control group and the medicated groups of nude mice. Saline solution (control), AZD2811 only, Olaparib only and AZD2811+Olaparib were administered to nude mice with skin cutaneous melanoma. Data represent means  $\pm$  SD. \* $P < 0.05$ . \*\* $P < 0.005$ .
